# Supplementary material for: New Evidence of Significant Association between EBV Presence and Lymphoproliferative Disorders Susceptibility in Patients with Rheumatoid Arthritis: A Systematic Review with Meta-Analysis
Source: MDPI journal article supplement (doi:10.3390/v14010115), 2022-01-10
Supplement: s1 [file s1]

## Supplementary material

Table S1. Systematic review

| Author, year                | Study design | n RA-LPD                                                  | n Controls                                | WHO classification of LPD                                                                                                                                                                                | LPD stage | RA activity | Controls/cohort characteristics                                                                                                                                                                | Age Cases vs. Controls                  | Gender, M/F        | Matching | EBV+ Cases                   | EBV+ Controls                | Specimen for EBV detection | EBV target              | Latency | EBV detection method                          |
|-----------------------------|--------------|-----------------------------------------------------------|-------------------------------------------|----------------------------------------------------------------------------------------------------------------------------------------------------------------------------------------------------------|-----------|-------------|------------------------------------------------------------------------------------------------------------------------------------------------------------------------------------------------|-----------------------------------------|--------------------|----------|------------------------------|------------------------------|----------------------------|-------------------------|---------|-----------------------------------------------|
| Kamel OW, 1994 [1] USA      | NR           | 15 Total<br>1 DML<br>9 DLCL<br>1 MCHD<br>3 FLCL<br>1 FSCL | 3 Total<br>2 LPI<br>1 NSHD                | DML - diffuse mixed lymphoma, DLCL - diffuse large cell lymphoma, MCHD - mixed cellularity, HL - Hodgkin's disease, FLCL - follicular large-cell lymphoma, FSCL - follicular small-cleaved-cell lymphoma | NR        | NR          | patients with dermatomyositis and a diagnosis of lymphoma or lymphoproliferative lesion (LPI - lymphoplasmacytic infiltrate 2 patients, NSHD - nodular sclerosing Hodgkin's disease 1 patient) | 67.9 (SD 13.3)<br>Vs.<br>40.6 (SD 25.5) | 2/13<br>Vs.<br>3/3 | NR       | 4                            | 1 - LPI<br>1- NSHD           | biopsy                     | anti LMP Ab<br>EBER1    | NR      | Immunohistochemistry<br>in situ hybridization |
| Bachman TR, 1996 [2] USA    | case series  | 2                                                         | NR                                        | Case 1 - Anaplastic large lymphoma with probable B phenotype<br>Case 2 - Diffuse large cell lymphoma with B cell phenotype (DLBCL)                                                                       | NR        | NR          | NO CONTROL GROUP                                                                                                                                                                               | 65 years<br>66 years                    | 1/1                | NR       | 2                            | NR                           | biopsy                     | EBER1                   | NR      | in situ hybridization                         |
| Van de Rijn M, 1996 [3] USA | NR           | 2                                                         | NR                                        | BCL - B-cell lymphoma                                                                                                                                                                                    | NR        | NR          | NO CONTROL GROUP                                                                                                                                                                               | NR                                      | 0/2                | NR       | 2                            | NR                           | biopsy                     | EBER                    | NR      | in situ hybridization                         |
| Georgescu L, 1997 [4] USA   | case series  | 2                                                         | NR                                        | NHL - non-Hodkin's lymphoma                                                                                                                                                                              | NR        | NR          | NO CONTROL GROUP                                                                                                                                                                               | Case 1 - 54 years<br>Case 2 - 77 years  | 0/2                | NR       | 0                            | NR                           | biopsy                     | NR                      | NR      | Southern blot, PCR                            |
| Natkunam Y, 1997 [5] USA    | NR           | 8 Total<br>2 LPD-HD<br>6 DLCL                             | 2 Total<br>1 DM with HD<br>1 DM with ALPD | LPD-HD - Lymphoproliferative disorder resembling Hodgkin's disease, DLCL - diffuse large cell lymphoma                                                                                                   | NR        | NR          | Dermatomyositis patients who developed LPD (HD - Hodgkin's disease 1 patient and ALPD - atypical lymphoproliferative disorder 1 patient)                                                       | NR                                      | NR                 | NR       | 8 EBER1<br>7 Imp<br>8 EBNA-2 | 2 EBER1<br>2 LMP<br>2 EBNA-2 | biopsy                     | EBER1<br>LMP and EBNA-2 | NR      | in situ hybridization<br>PCR                  |

|                                            |             |                                                                        |                                                                         |                                                                                                                                                                                                                |    |                                                                                                                                                                                                   |                                                            |                                                                                  |                    |    |                                                                          |                                                                          |        |                                |    |                                                |
|--------------------------------------------|-------------|------------------------------------------------------------------------|-------------------------------------------------------------------------|----------------------------------------------------------------------------------------------------------------------------------------------------------------------------------------------------------------|----|---------------------------------------------------------------------------------------------------------------------------------------------------------------------------------------------------|------------------------------------------------------------|----------------------------------------------------------------------------------|--------------------|----|--------------------------------------------------------------------------|--------------------------------------------------------------------------|--------|--------------------------------|----|------------------------------------------------|
| Kleiman KS, 1998 [6] USA                   | case series | 4                                                                      | NR                                                                      | Case 1 - Diffuse large cell immunoblastic lymphoma<br>Case 2 - Hodgkin's lymphoma<br>Anaplastic large cell lymphoma<br>Case 3 - BCL - B-cell lymphoma<br>Case 4 - NHL - non-Hodgkin's lymphoma                 | NR | RF titer<br>Case 1 - increased from 1/320 to 1/1310720<br>Case 2 - 1/2560; nephelometry from 132 U/mL to 38 U/mL<br>Case 3 - decreased from 331 U/mL, 243 U/mL to 38 U/mL<br>Case 4 - RF negative | NO CONTROL GROUP                                           | Case 1 - 71 years<br>Case 2 - 78 years<br>Case 3 - 75 years<br>Case 4 - 68 years | 3/1                | NR | 2                                                                        | NR                                                                       | biopsy | EBER                           | NR | in situ hybridization                          |
| Kojima M, 1998 [7] Japan                   | NR          | 5                                                                      | 18                                                                      | PTLD - Florid follicular hyperplasia                                                                                                                                                                           | NR | NR                                                                                                                                                                                                | P tients florid reactive follicular hyperplasia without RA | 72.4 (SD 6.2)<br>Vs.<br>66.6 (SD 4.6)                                            | 2/3<br>Vs.<br>8/10 | NR | 1 EBER                                                                   | 6 EBER                                                                   | biopsy | EBERs                          | NR | in situ hybridization                          |
| Chevrel G, 1999 [8] France                 | case series | 2                                                                      | NR                                                                      | Case 1 and Case 2 - Polymorphic diffuse B cell lymphoproliferation                                                                                                                                             | NR | NR                                                                                                                                                                                                | NO CONTROL GROUP                                           | Case 1 - 64 years<br>Case 2 - 67 years                                           | 1/1                | NR | 1                                                                        | NR                                                                       | biopsy | EBERs                          | NR | in situ hybridization                          |
| Goodlad JR, 1999 [9] Multicenter (UK, USA) | case series | 3                                                                      | NR                                                                      | Case 1, 2, and 3 - NHL - non-Hodgkin's lymphoma                                                                                                                                                                | NR | NR                                                                                                                                                                                                | NO CONTROL GROUP                                           | Case 1 - 33 years<br>Case 2 - 67 years<br>Case 3 - 76 years                      | 0/3                | NR | 0                                                                        | NR                                                                       | biopsy | EBER1 EBER2                    | NR | in situ hybridization                          |
| Menke DM, 2000 [10] USA                    | NR          | 23 Total<br>3 HL<br>10 NHL<br>1 SLL<br>1 LPL<br>5 LBCL<br>2 BL<br>1 FL | 21 Total<br>1 HL<br>10 NHL<br>1 LPL<br>2 MALT<br>5 LBCL<br>1 BL<br>1 FL | HL - Hodgkin's lymphoma, NHL - non-Hodgkin's lymphoma, SLL - small lymphocytic lymphoma, LPL - lymphoplasmocitoid lymphoma, LBCL - large B-cell lymphoma, BL - Burkitt-like lymphoma, FL - follicular lymphoma | NR | NR                                                                                                                                                                                                | RA-LPD without MTX                                         | NR                                                                               | 5/8                | NR | 3/3 HL<br>4/10 NHL<br>0/1 SLL<br>0/1 LPL<br>2/5 LBCL<br>1/2 BL<br>1/1 FL | 1/1HL<br>1/10 NHL<br>0/1 LPL<br>0/2 MALT<br>1/5 LBCL<br>0/1 BL<br>0/1 FL | biopsy | EBERs<br>anti LMP Ab<br>BamH1W | NR | in situ hybridization immunohistochemistry PCR |
| Dawson TM, 2001 [11] USA                   | NR          | 19                                                                     | 6                                                                       | Large cell lymphoma, Small cell lymphoma, HL - Hodgkin's lymphoma, FL - follicular lymphoma, Mixed cell lymphoma                                                                                               | NR | NR                                                                                                                                                                                                | Sjogren syndrome LPD patients                              | Median 62 (range 40-81)<br>Vs.<br>Median 69 (range 58-77)                        | 6/13<br>Vs.<br>1/5 | NR | 5/19                                                                     | 1/6                                                                      | biopsy | EBER                           | NR | in situ hybridization                          |

|                               |               |                                                                                                                                                                                                                                                                 |    |                                                                                                                                                                                                                                                                                                                               |    |                                                                                                                                                                                                                                                                                 |                                                                                                                                                                                   |                                         |                   |    |                                                                                                                                                                                                                                                                           |     |        |                               |    |                                                      |
|-------------------------------|---------------|-----------------------------------------------------------------------------------------------------------------------------------------------------------------------------------------------------------------------------------------------------------------|----|-------------------------------------------------------------------------------------------------------------------------------------------------------------------------------------------------------------------------------------------------------------------------------------------------------------------------------|----|---------------------------------------------------------------------------------------------------------------------------------------------------------------------------------------------------------------------------------------------------------------------------------|-----------------------------------------------------------------------------------------------------------------------------------------------------------------------------------|-----------------------------------------|-------------------|----|---------------------------------------------------------------------------------------------------------------------------------------------------------------------------------------------------------------------------------------------------------------------------|-----|--------|-------------------------------|----|------------------------------------------------------|
| Tournadre A, 2001 [12] France | NR            | 1                                                                                                                                                                                                                                                               | 1  | TCL - T-cell lymphoma                                                                                                                                                                                                                                                                                                         | NR | NR                                                                                                                                                                                                                                                                              | dermatomyositis LPD patient                                                                                                                                                       | Individual data<br>70<br>Vs.<br>47      | 1/0<br>Vs.<br>0/1 | NR | 1                                                                                                                                                                                                                                                                         | 1   | biopsy | EBER                          | NR | in situ hybridization                                |
| Mariette X, 2002 [13] France  | prospective   | 25                                                                                                                                                                                                                                                              | NR | HL - Hodgkin's lymphoma<br>NHL - non-Hodgkin's lymphoma                                                                                                                                                                                                                                                                       | NR | NR                                                                                                                                                                                                                                                                              | NO CONTROL GROUP                                                                                                                                                                  | Mean 63 (range 39-82)                   | 10/15             | NR | 8/25                                                                                                                                                                                                                                                                      | NR  | biopsy | EBERs<br>anti LMP Ab<br>EBNA1 | NR | in situ hybridization<br>immunohistochemistry<br>PCR |
| Baecklund E, 2003 [14] Sweden | case-control  | 35 Total<br>2 HL<br>33 NHL:<br>22 DLBCL<br>1<br>hepatosplenic<br>T cell<br>lymphoma<br>2 FL<br>1<br>lymphoplasmacytic<br>lymphoma<br>1 Burkitt's<br>lymphoma<br>2 unspecified<br>high-grade<br>NHL<br>1 unspecified<br>low-grade<br>NHL<br>1 unspecified<br>NHL | NR | HL - Hodgkin's lymphoma,<br>NHL - non-Hodgkin's<br>lymphoma: DLBCL - diffuse<br>large B cell lymphoma,<br>hepatosplenic T cell<br>lymphoma, FL - follicular<br>lymphoma,<br>lymphoplasmacytic<br>lymphoma, BL - Burkitt's<br>lymphoma,<br>unspecified high-grade NHL,<br>unspecified low-grade NHL,<br>and<br>unspecified NHL | NR | ESR, number<br>of tender and<br>swollen<br>joints,<br>and<br>physician's<br>global<br>assessment of<br>disease<br>activity:<br>Low (ESR 1-<br>30, joints 0-3)<br>2 patients<br>Medium (ESR<br>31-60, joints<br>4-6) 14<br>patients<br>High (ESR≥61,<br>joints≥7) 19<br>patients | NO CONTROL GROUP                                                                                                                                                                  | NR                                      | NR                | NR | 0/1 HL<br>4/22<br>DLBCL<br>0/1<br>hepatosplenic<br>T cell<br>lymphoma<br>0/2 FL<br>1/1<br>lymphoplasmacytic<br>lymphoma<br>0/1<br>Burkitt's<br>lymphoma<br>0/2<br>unspecified<br>high-grade<br>NHL<br>0/1<br>unspecified<br>low-grade<br>NHL<br>0/1<br>unspecified<br>NHL | NR  | biopsy | EBER                          | NR | in situ hybridization                                |
| Magro CM, 2004 [15] USA       | retrospective | 2                                                                                                                                                                                                                                                               | 9  | plasmacytic marginal zone<br>lymphoma with reactive<br>germinal<br>centers and a background<br>population of small marginal<br>zone neoplastic B<br>lymphocytes                                                                                                                                                               | NR | NR                                                                                                                                                                                                                                                                              | T cell rich plasmacytic<br>marginal zone lymphoma<br>and plasmacytic marginal<br>zone lymphoma<br>unaccompanied<br>by a significant small<br>lymphocytic infiltrate<br>without RA | 71.5 (SD 2.12)<br>Vs.<br>66.0 (SD 1.41) | 0/2<br>Vs.<br>6/3 |    | 0/2                                                                                                                                                                                                                                                                       | 1/9 | biopsy | EBER                          | NR | in situ hybridization                                |
| Verma S, 2005 [16] USA        | NR            | 1                                                                                                                                                                                                                                                               | 5  | DLBCL - Diffuse large B-cell<br>lymphoma                                                                                                                                                                                                                                                                                      | NR | NR                                                                                                                                                                                                                                                                              | posttransplant patients<br>with LPD                                                                                                                                               | 75<br>Vs.<br>39.8±7.79                  | 0/1<br>Vs.<br>3/2 | NR | 1                                                                                                                                                                                                                                                                         | 5   | biopsy | EBER                          | NR | in situ hybridization                                |

|                                  |              |                                                                                           |     |                                                                |                |                                                                                                                                                                                                                                                                                                                                                                                                                                                                                                                                                  |                                                                                                                                                                                                                                                                                                      |                                       |                           |                                                                               |                                                                                                      |    |        |       |    |                       |
|----------------------------------|--------------|-------------------------------------------------------------------------------------------|-----|----------------------------------------------------------------|----------------|--------------------------------------------------------------------------------------------------------------------------------------------------------------------------------------------------------------------------------------------------------------------------------------------------------------------------------------------------------------------------------------------------------------------------------------------------------------------------------------------------------------------------------------------------|------------------------------------------------------------------------------------------------------------------------------------------------------------------------------------------------------------------------------------------------------------------------------------------------------|---------------------------------------|---------------------------|-------------------------------------------------------------------------------|------------------------------------------------------------------------------------------------------|----|--------|-------|----|-----------------------|
| Au WY, 2006 [17]<br>China        | NR           | 2                                                                                         | 9   | BCL - B-cell lymphoma                                          | NR             | NR                                                                                                                                                                                                                                                                                                                                                                                                                                                                                                                                               | Patients with other autoimmune diseases (SLE, UC - ulcerative colitis, psoriasis, CFA-cryptogenic fibrosing alveolitis, VKH - Vogts-Kaganagi-Harada syndrome) and lymphoma                                                                                                                           | 63.5 (SD 4.9)<br>Vs.<br>49.0 (SD 9.9) | 0/2<br>Vs.<br>4/5         | NR                                                                            | 2                                                                                                    | 3  | biopsy | EBERs | NR | in situ hybridization |
| Baecklund E, 2006 [18]<br>Sweden | case-control | 378 Total<br>269 BCL<br>16 TCL and NK cell neoplasms<br>21 HL<br>37 Unspecified lymphomas | 378 | BCL<br>TCL and NK cell neoplasms<br>HL<br>Unspecified lymphoma | I, II, III, IV | - ESR, number of tender and swollen joints, and physician's global assessment of disease activity the overall disease activity was:<br>Low (ESR 1-30, joints 0-3) 94/278 cases/control s;<br>Medium (ESR 31-60, joints 4-6) 196/94 cases/control s;<br>High (ESR ≥ 61, joints ≥ 7) 86/4 cases/control s<br>- cumulative disease activity, as the duration (in months) of 4 different levels:<br>I - inactive 34/138 cases/control s<br>II - low 185/204 cases/control s<br>III - medium 105/31 cases/control s<br>IV - high 52/3 cases/control s | Lymphoma-free individuals from the RA cohort without any registered lymphoma at the time lymphoma was diagnosed in the corresponding RA case. Controls were individually matched according to sex, year of birth, year of first hospital discharge with a diagnosis of RA, and country of residence. | NR                                    | 170/208<br>Vs.<br>170/208 | Yes (sex, year of birth, year of first RA discharge, and county of residence) | 37/304 Total<br>23/258 BCL<br>2/15 TCL and NK cell neoplasms<br>9/19 HL<br>3/12 unspecified lymphoma | NR | biopsy | EBER  | NR | in situ hybridization |

|                               |             |                                                                                                                                                              |                                                                                                                                                      |                                                                                                                                                                                                                                                     |                                    |    |                                                                                                                                              |                                                           |                 |    |                                                                                                                                                                        |                                                                                                                        |        |          |    |                                            |
|-------------------------------|-------------|--------------------------------------------------------------------------------------------------------------------------------------------------------------|------------------------------------------------------------------------------------------------------------------------------------------------------|-----------------------------------------------------------------------------------------------------------------------------------------------------------------------------------------------------------------------------------------------------|------------------------------------|----|----------------------------------------------------------------------------------------------------------------------------------------------|-----------------------------------------------------------|-----------------|----|------------------------------------------------------------------------------------------------------------------------------------------------------------------------|------------------------------------------------------------------------------------------------------------------------|--------|----------|----|--------------------------------------------|
| Hoshida Y, 2006 [19]<br>Japan | NR          | 76 Total<br>60 BCL (44 DLBCL, 3 diffuse polymorphic, 1 HL-like LPD, 12 other)<br>7 TCL<br>1 NK cell lymphoma<br>8 HL<br>48 MTX treated<br>28 non-MTX treated | 150 Total<br>111 BCL (64 DLBCL, 23 FL, 4 lymphoplasmacytic, 1 plasmacytoma, 3 mantle cell lymphoma, 16 others)<br>16 TCL<br>6 NK/T cell LPD<br>16 HL | BCL (DLBCL, FL, lymphoplasmacytic, plasmacytoma, mantle cell lymphoma, diffuse polymorphic, HL-like LPD, other), TCL, NK cell lymphoma, HL                                                                                                          | I, II, III, IV; undetermined       | NR | Sporadic LPD patients (BCL - DLBCL, FL, lymphoplasmacytic, plasmacytoma, mantle cell lymphoma, other; TCL; NK/T cell LPD; HL)                | Median 66 (range 23-87)<br>Vs.<br>Median 58 (range 17-87) | 21/55 Vs. 93/57 | NR | 10/60 BCL (6/44 DLBCL, 3/3 diffuse polymorphic, 1/1 HL-like LPD, 0/12 other)<br>3/7 TCL<br>1/1 NK cell lymphoma<br>7/8 HL<br>13/48 MTX treated<br>8/28 non-MTX treated | 2/87 BCL (2/50 DLBCL, 0/0 diffuse polymorphic, 0/0 HL-like LPD, 0/37 others)<br>2/9 TCL<br>4/5 NK/T cell LPD<br>3/8 HL | biopsy | EBER     | NR | in situ hybridization                      |
| Kojima M, 2006 [20]<br>Japan  | case-report | 13 Total<br>4 DLBCL<br>3 HL<br>2 MALT<br>1 peripheral T-cell lymphoma<br>3 PSLLPI                                                                            | NR                                                                                                                                                   | DLBCL - diffuse large B-cell lymphomas, HL - Hodgkin's lymphoma, MALT - marginal zone B-cell lymphoma, peripheral T-cell lymphoma, PSLLPI - polymorphous, small lymphocytic or lymphoplasmacytic infiltrate                                         | IA, IB, IEA, IAE, IIIB, IVAE, IVBE | NR | NO CONTROL GROUP                                                                                                                             | Median 63 (range 52-86)                                   | 4/9             | NR | 7/13 EBER<br>4/11 LMP                                                                                                                                                  | NR                                                                                                                     | biopsy | EBER LMP | NR | in situ hybridization immunohistochemistry |
| Kojima M, 2006 [21]<br>Japan  | case-report | 17 Total<br>3 HL<br>18 BCL<br>3 TCL<br>4 HL<br>2 MALT<br>12 DLBCL<br>2 angioimmunoblastic T-cell lymphoma<br>1 primary cutaneous T-cell lymphoma             | 7 Total<br>3 SLE<br>2 DM<br>2 SS                                                                                                                     | HL - Hodgkin's lymphoma, BCL - B-cell lymphoma, TCL - T-cell lymphoma, FL - follicular lymphoma, MALT - marginal zone B-cell lymphoma, DLBCL - diffuse large B-cell lymphoma, Angioimmunoblastic T-cell lymphoma, Primary cutaneous T-cell lymphoma | I, II, III, IV                     | NR | Patients with Systemic Rheumatic Diseases other than RA, (SLE - systemic lupus erythematosus, DM - dermatomyositis, SS - systemic sclerosis) | NR                                                        | NR              | NR | 17 Total<br>RA<br>3/3 HL<br>0/18 BCL<br>0/3 TCL<br>0/4 HL<br>0/2 MALT<br>0/12 DLBCL<br>0/2 angioimmunoblastic T-cell lymphoma<br>0/1 primary cutaneous T-cell lymphoma | 7 Total<br>0/3 SLE<br>0/2 DM<br>0/2 SS                                                                                 | biopsy | EBER LMP | NR | in situ hybridization immunohistochemistry |

|                                                        |               |                                                                                                                                                                                       |    |                                                                                                                                                                     |                |                                       |                                                                                                                                                                             |                                                                    |             |    |                                                                                                                                                                                                                                    |     |        |                    |                              |                                            |
|--------------------------------------------------------|---------------|---------------------------------------------------------------------------------------------------------------------------------------------------------------------------------------|----|---------------------------------------------------------------------------------------------------------------------------------------------------------------------|----------------|---------------------------------------|-----------------------------------------------------------------------------------------------------------------------------------------------------------------------------|--------------------------------------------------------------------|-------------|----|------------------------------------------------------------------------------------------------------------------------------------------------------------------------------------------------------------------------------------|-----|--------|--------------------|------------------------------|--------------------------------------------|
| Xu JX, 2007 [19]<br>Japan                              | NR            | 53 Total<br>41 BCL (24 TTX + 17 non-MTX)<br>31 DLBCL (18 MTX + 13 non-MTX)<br>2 polymorphic (1 MTX + 1 non-MTX)<br>1 Hodgkin-like (1MTX)<br>6 TCL (2 MTX + 4 non-MTX)<br>5 HL (5 MTX) | NR | BCL - B-cell lymphoma<br>DLBCL - diffuse large B-cell lymphoma<br>polymorphic lymphoma<br>Hodgkin-like lymphoma<br>TCL - T-cell lymphoma<br>HL - Hodgkin's lymphoma | I, II, III, IV | NR                                    | NO CONTROL GROUP                                                                                                                                                            | MTX – median 67 (range 34-87)<br>Non-MTX - median 66 (range 23-77) | 13/31       | NR | 14/53<br>Total<br>0/41 BCL<br>(0/24 TTX + 0/17 non-MTX)<br>3/31 DLBCL<br>(2/18 MTX + 1/13 non-MTX)<br>2/2 polymorphic (1/1 MTX + 1/1 non-MTX)<br>1/11 Hodgkin-like (1/1MTX)<br>4/6 TCL (1/2 MTX + 3/4 non-MTX)<br>4/5 HL (4/5 MTX) | NR  | biopsy | EBER               | NR                           | in situ hybridization                      |
| Miyazaki T, 2007 [22]<br>Japan                         | retrospective | 9 Total<br>8 DLBCL<br>1 PTCL-u                                                                                                                                                        | NR | DLBCL - diffuse large B-cell lymphoma, PTCL-u - peripheral T-cell lymphoma, unspecified                                                                             | I, II, III, IV | CRP 1.09 (0.10-5.83) median (min-max) | NO CONTROL GROUP                                                                                                                                                            | Mean 65.0 (SD 7.8)                                                 | 3/6         | NR | 3/9 Total<br>3/8 DLBCL<br>0/1 PTCL-u                                                                                                                                                                                               | NR  | biopsy | EBER LMP and EBNA2 | 2 latency III a 1 latency II | in situ hybridization immunohistochemistry |
| Kleinschmidt-DeMasters BK, 2008 [23]<br>USA            | NR            | 1                                                                                                                                                                                     | 3  | Polymorphus lymphoplasmacytic EBV associated LPD                                                                                                                    | NR             | NR                                    | Patients with neuropathy, polymyositis, myasthenia gravis                                                                                                                   | Individual data 78 Vs. 65, 65, and 80 years                        | 0/1 Vs. 2/1 | NR | 1                                                                                                                                                                                                                                  | 3   | biopsy | EBER               | NR                           | in situ hybridization                      |
| Hasserjian RP, 2009 [24]<br>Multicenter (USA, Belgium) | NR            | 5                                                                                                                                                                                     | 6  | TCL - T-cell lymphoma, ALCL - anaplastic large cell lymphoma, FL - follicular lymphoma, Extranodal marginal zone B-cell lymphoma, HL - Hodgkin's lymphoma           | NR             | NR                                    | LPD (FL - follicular lymphoma, DLBCL - diffuse large B-cell lymphoma, HL - Hodgkin's lymphoma, LPL - lymphoplasmacytic lymphoma) patients with psoriasis or Chron's disease | 59.8 (SD 11.3) Vs. 61.6 (SD 12.5)                                  | 0/5 Vs. 3/3 | NR | 1/5                                                                                                                                                                                                                                | 5/6 | biopsy | EBER               | NR                           | in situ hybridization                      |

|                                 |        |                                                                                                                                                                                                           |     |                                                                                                                                                                                                                                                                                                              |                |                                                                                                                                                                                                                                                                                                                                                          |                                                                                                                                                                                                                                                                                                                                                                                                                                                                                                                                                                                                                                                                                       |                                         |                           |                                                                               |                                                                                                                                                                                                                                 |     |        |      |    |                       |
|---------------------------------|--------|-----------------------------------------------------------------------------------------------------------------------------------------------------------------------------------------------------------|-----|--------------------------------------------------------------------------------------------------------------------------------------------------------------------------------------------------------------------------------------------------------------------------------------------------------------|----------------|----------------------------------------------------------------------------------------------------------------------------------------------------------------------------------------------------------------------------------------------------------------------------------------------------------------------------------------------------------|---------------------------------------------------------------------------------------------------------------------------------------------------------------------------------------------------------------------------------------------------------------------------------------------------------------------------------------------------------------------------------------------------------------------------------------------------------------------------------------------------------------------------------------------------------------------------------------------------------------------------------------------------------------------------------------|-----------------------------------------|---------------------------|-------------------------------------------------------------------------------|---------------------------------------------------------------------------------------------------------------------------------------------------------------------------------------------------------------------------------|-----|--------|------|----|-----------------------|
| Hellgren K, 2010 [25]<br>Sweden | cohort | 378                                                                                                                                                                                                       | 378 | DLBCL - diffuse large B-cell lymphoma, FL -follicular lymphoma, Other BCL, T/NK cell lymphoma, HL - Hodgkin's lymphoma, Unspecified lymphomas, EBV+ lymphomas                                                                                                                                                | I, II, III, IV | -ESR, number of tender and swollen joints, and physician's global assessment of disease activity the overall disease activity was: Inactive, Low, Medium, and High<br>-Cumulative disease activity for the whole RA period was calculated as the area under the curve (AUC) for the duration in months of the four different levels of disease activity. | From the RA cohort (n=74 651) three patients were randomly selected as potential controls, matched for sex, year of birth, year of first RA discharge and county of residence. Controls had to be alive and without any registered cancer at the time of the lymphoma diagnosis of their corresponding case. Among these potential controls we included the first of the three controls whose medical record could be identified and who fulfilled the American College of Rheumatology criteria for RA                                                                                                                                                                               | NR                                      | 170/208<br>Vs.<br>170/208 | Yes (sex, year of birth, year of first RA discharge, and county of residence) | 32/343                                                                                                                                                                                                                          | NR  | biopsy | EBER | NR | in situ hybridization |
| Mariette X, 2010 [26]<br>France | NR     | 27 Total<br>22 non-HL<br>20 BCL<br>11 DLBCL<br>3 FL<br>1 marginal zone B-cell lymphoma<br>1 lymphocytic lymphoma<br>4 other<br>2 TCL<br>2 pleomorphic T-cell lymphoma<br>5 HL and Hodgkin's like lymphoma | 54  | non-HL - non-Hodgkin's lymphoma, BCL - B-cell lymphoma, DLBCL - diffuse large B-cell lymphoma, FL - follicular B-cell lymphoma, Marginal zone B-cell lymphoma, Lymphocytic B cell lymphoma, Other B-cell lymphomas, TCL - T-cell lymphoma, Pleomorphic TCL, HL - Hodgkin's lymphoma, Hodgkin's like lymphoma | NR             | NR                                                                                                                                                                                                                                                                                                                                                       | Lymphoma-free patients receiving anti-TNF treatment in a labelling indication were included from centres participating in the RATIO registry (thus from the same population source) in a global pool of controls. From that pool, we randomly selected patients for a database of controls reflecting the proportion of patients receiving each of the three anti-TNF drugs in France. Two controls per case were randomly matched by sex, age (within 5 years) and underlying inflammatory disease from this database of controls. We also used a second sample of controls randomly selected from the same database of controls, with the same matching criteria (second matching). | 63.4 (SD 11.8)                          | 12/15                     | Yes (sex, age (within 5 years), and underlying inflammatory disease)          | 2/27 Total<br>0/22 non-HL<br>0/20 BCL<br>0/11 DLBCL<br>0/3 FL<br>0/1 marginal zone B-cell lymphoma<br>0/1 lymphocytic lymphoma<br>0/4 other<br>0/2 TCL<br>0/2 pleomorphic T-cell lymphoma<br>2/5 HL and Hodgkin's like lymphoma |     | biopsy | EBER | NR | in situ hybridization |
| Kojima M, 2010 [27]<br>Japan    | NR     | 3                                                                                                                                                                                                         | 6   | ALPILB - atypical lymphoplasmacytic immunoblastic proliferation (rare LPD)                                                                                                                                                                                                                                   | NR             | All 3 RA cases had active form                                                                                                                                                                                                                                                                                                                           | Rheumatic diseases other than RA (SLE - systemic lupus erythematosus, DM -dermatomyositis, SJS - Sjogren's syndrome)                                                                                                                                                                                                                                                                                                                                                                                                                                                                                                                                                                  | 62.3 (SD 12.5)<br>Vs.<br>42.3 (SD 13.5) | 0/3<br>Vs.<br>0/6         | NR                                                                            | 0/3                                                                                                                                                                                                                             | 0/6 | biopsy | EBER | NR | in situ hybridization |

|                                 |    |    |    |                                                                                                                                                                                                                                                                                                                                                                                                                                                                                                                                                                                                                                                                                                                                                                                                                                                                                                                                                                                                                                                                                                                                                                                                                                                                                                                    |                |                                                                                                           |                                                                           |                                         |                   |    |      |      |        |      |    |                       |
|---------------------------------|----|----|----|--------------------------------------------------------------------------------------------------------------------------------------------------------------------------------------------------------------------------------------------------------------------------------------------------------------------------------------------------------------------------------------------------------------------------------------------------------------------------------------------------------------------------------------------------------------------------------------------------------------------------------------------------------------------------------------------------------------------------------------------------------------------------------------------------------------------------------------------------------------------------------------------------------------------------------------------------------------------------------------------------------------------------------------------------------------------------------------------------------------------------------------------------------------------------------------------------------------------------------------------------------------------------------------------------------------------|----------------|-----------------------------------------------------------------------------------------------------------|---------------------------------------------------------------------------|-----------------------------------------|-------------------|----|------|------|--------|------|----|-----------------------|
| Nakamichi N, 2010 [28]<br>Japan | NR | 6  | 13 | <p>polymorphus LPD – with neither diagnostic Reed-Sternberg (RS) cells nor a substantial number of medium-to-large T cells with nuclear hyperchromasia, and variable numbers of bizarre cells with multilobed nuclei, indicating that diagnoses of HL or PTCL were unlikely in these cases.</p> <p>Cases with monoclonal rearrangement of the TCR gene, but without specific characteristics, such as positive anti-human T lymphotropic virus type I (HTLV-I) antibody and/or monoclonal integration of HTLV-1 proviral DNA in the tumor cells, and appearance of clusters of “clear cells,” were classified as PTCL-NOS.</p> <p>Cases showing diffuse proliferation of large B-lymphoid cells with a prominent polymorphous cellular background containing small lymphoid cells, plasma cells, histiocytes, and/or eosinophils that appeared neoplastic were classified as DLBCL-NOS.</p> <p>Cases in individuals &gt;50 years, with the EBV genome in the nuclei of proliferating cells, with no known immunodeficiency or prior lymphoma, were classified as EBV+ DLBCL-E. LPD that arose in patients treated with immunosuppressive drugs for autoimmune diseases or conditions other than an allograft/ autograft transplant setting were classified as other iatrogenic immunodeficiency-associated LPD</p> | I, II, III, IV | <p>Performance status (PS)</p> <p>PS 0 - 2 patients</p> <p>PS 1 - 2 patients</p> <p>PS 4 - 2 patients</p> | Patients with polymorphus LPD without immune abnormalities and without RA | 68.7 (SD 10.0)<br>Vs.<br>54.5 (SD 18.4) | 0/6<br>Vs.<br>7/6 | NR | 4/6  | 4/13 | biopsy | EBER | NR | in situ hybridization |
| Niitsu N, 2010 [29]<br>Japan    | NR | 29 | NR | DLBCL - diffuse large B-cell lymphoma                                                                                                                                                                                                                                                                                                                                                                                                                                                                                                                                                                                                                                                                                                                                                                                                                                                                                                                                                                                                                                                                                                                                                                                                                                                                              | I, II, III, IV | <p>Performance status (PS)</p> <p>PS 0,1 - 25 patients</p> <p>PS 2-4 - 4 patients</p>                     | NO CONTROL GROUP                                                          | Median 62<br>(range 43-78)              | 8/21              | NR | 7/29 | NR   | biopsy | EBER | NR | in situ hybridization |



|                               |    |    |                                  |                                                                                                                                                                                                                                                                                                                                                                              |                |                                                                                                                                                                                                                                                                                                                                                          |                                                                                                                 |                                             |                       |    |       |         |        |                |    |                       |
|-------------------------------|----|----|----------------------------------|------------------------------------------------------------------------------------------------------------------------------------------------------------------------------------------------------------------------------------------------------------------------------------------------------------------------------------------------------------------------------|----------------|----------------------------------------------------------------------------------------------------------------------------------------------------------------------------------------------------------------------------------------------------------------------------------------------------------------------------------------------------------|-----------------------------------------------------------------------------------------------------------------|---------------------------------------------|-----------------------|----|-------|---------|--------|----------------|----|-----------------------|
| Löfström B, 2011 [30] Sweden  | NR | 95 | 12 SLE<br>63<br>Comparator cases | DLBCL - diffus large B-cell lymphoma                                                                                                                                                                                                                                                                                                                                         | I, II, III, IV | -ESR, number of tender and swollen joints, and physician's global assessment of disease activity the overall disease activity was: Inactive, Low, Medium, and High<br>-Cumulative disease activity for the whole RA period was calculated as the area under the curve (AUC) for the duration in months of the four different levels of disease activity. | SLE-LPD (DLBCL)<br>Comparator cases were DLBCL patients without chronic inflammatory disease (EBV not assessed) | 50.8 (SD 13.7)<br>Vs.<br>SLE 45.8 (SD 14.6) | 42/53<br>Vs.<br>32/43 | NR | 10/91 | 1/8 SLE | biopsy | EBER           | NR | In situ hybridization |
| Minamimoto R, 2011 [31] Japan | NR | 5  | 1                                | DLBCL - diffuse large B-cell lymphoma, HL - Hodgkin's lymphoma, peripheral T-cell lymphoma                                                                                                                                                                                                                                                                                   | NR             | NR                                                                                                                                                                                                                                                                                                                                                       | Psoriasis with LPD (DLBCL)                                                                                      | 67 (SD 10.0)<br>Vs.<br>42 years             | 1/4<br>Vs.<br>1/0     | NR | 5/5   | NR      | biopsy | anti-EBV CA Ab | NR | ELISA                 |
| Tokuhira M, 2012 [32] Japan   | NR | 23 | NR                               | DLBCL - diffuse large B-cell lymphoma, DLBCL-LYG - diffuse large B-cell lymphoma- lymphogranulomatosis, FL - follicular lymphoma, PTCL-NOS - peripheral T-cell lymphoma-not otherwisw specified, MALT - mucosal associated lymphoid tissue, MDLBCL - mediastinal diffuse large B-cell lymphoma, HL - Hodgkin's lymphoma, HL-like - Hodgkin's like lymphoma, Unclassified LPD | I, II, III, IV | CRP<br>5.3 (0.1-32.3)<br>median (min-max)                                                                                                                                                                                                                                                                                                                | NO CONTROL GROUP                                                                                                | Mean 62.7                                   | 7/16                  | NR | 7/23  | NR      | biopsy | EBER           | NR | In situ hybridization |

|                                |    |     |    |                                                                                                                                                                                                 |                |    |                                                                                                                                                                  |                                                                            |                   |    |                                                                                                                                                                                                                                                                                                                                                                               |                     |        |                       |                 |                                               |
|--------------------------------|----|-----|----|-------------------------------------------------------------------------------------------------------------------------------------------------------------------------------------------------|----------------|----|------------------------------------------------------------------------------------------------------------------------------------------------------------------|----------------------------------------------------------------------------|-------------------|----|-------------------------------------------------------------------------------------------------------------------------------------------------------------------------------------------------------------------------------------------------------------------------------------------------------------------------------------------------------------------------------|---------------------|--------|-----------------------|-----------------|-----------------------------------------------|
| Ichikawa A, 2013 [33]<br>Japan | NR | 102 | NR | DLBCL - diffuse large B-cell lymphoma, HL - Hodgkin's lymphoma, Polymorphic B-cell LPD, FL - follicular lymphoma, PTCL - peripheral T-cell lymphoma, Reactive lymphadenitis, Composite lymphoma | I, II, III, IV | NR | NO CONTROL GROUP                                                                                                                                                 | Median 69<br>(range 42-88)                                                 | 18/84             | NR | TOTAL<br>56/93<br>23/49<br>DLBCL<br>3/8 HL<br>14/19<br>Polymorphic B-cell LPD<br>1/3 FL<br>3/3 PTCL<br>5/9<br>Reactive lymphadenitis<br>2/2<br>Composite lymphoma                                                                                                                                                                                                             | NR                  | biopsy | EBER<br>LMP and EBNA2 | NR              | In situ hybridization<br>immunohistochemistry |
| Kondo S, 2013 [34]<br>Japan    | NR | 54  | NR | Mature B LPD, DLBCL - diffuse large B-cell lymphoma, Myeloma, MALT - mucosal associated lymphoid tissue, MCL - Mantle cell LPD, Mature T/NK cell LPD, HL - Hodgkin's lymphoma                   | I, II, III, IV | NR | NO CONTROL GROUP                                                                                                                                                 | MTX<br>median 66<br>(range 55-75)<br>non-MTX<br>median 65<br>(range 41-77) | 13/41             | NR | TOTAL<br>13/28<br>MTX<br>treated<br>2/26-Non-MTX<br>Mature B LPD<br>(6/15MTX<br>1 1/22<br>non-MTX)<br>DLBCL<br>(6/14 MTX<br>and 1/16<br>non-MTX)<br>Myeloma<br>(0/0 MTX<br>and 0/1<br>non-MTX)<br>MALT<br>(0/0MTX<br>and 0/5<br>non-MTX)<br>MCL (0/1<br>MTX and<br>0/0 non-MTX)<br>Mature T/NK cell LPD (4/8<br>MTX and<br>0/2 non-MTX)<br>HL (3/5<br>MTX and<br>1/2 non-MTX) | NR                  | biopsy | EBER<br>LMP and EBNA2 | NR              | In situ hybridization<br>immunohistochemistry |
| Loo EY, 2013 [35]<br>USA       | NR | 5   | 5  | Classical Hodgkin's lymphoma                                                                                                                                                                    | I, II, III, IV | NR | Patients with autoimmune diseases (DM - dermatomyositis, autoimmune hepatitis, Waldenstrom macroglobulinemia, Crohn disease, SLE - systemic lupus erythematosus) | 58.8 (SD 17.2)<br>Vs.<br>45.8 (SD 12.0)                                    | 1/4<br>Vs.<br>0/5 | NR | 3/5 EBER<br>1/4 LMP                                                                                                                                                                                                                                                                                                                                                           | 5/5 EBER 1/5<br>LMP | biopsy | EBER<br>LMP           | I 3/8<br>II 5/8 | In situ hybridization<br>immunohistochemistry |

|                                   |                     |    |                                                                 |                                                                                                                                                                  |                |                                                                                                                                                                                                                                                                     |                                                                                                                                 |                                                                                                             |                    |                   |                                                              |     |                             |                                                     |                                     |                                                                |
|-----------------------------------|---------------------|----|-----------------------------------------------------------------|------------------------------------------------------------------------------------------------------------------------------------------------------------------|----------------|---------------------------------------------------------------------------------------------------------------------------------------------------------------------------------------------------------------------------------------------------------------------|---------------------------------------------------------------------------------------------------------------------------------|-------------------------------------------------------------------------------------------------------------|--------------------|-------------------|--------------------------------------------------------------|-----|-----------------------------|-----------------------------------------------------|-------------------------------------|----------------------------------------------------------------|
| Yamakawa N, 2014 [36]<br>Japan    | NR                  | 20 | 1                                                               | p-LPD - polymorphic lymphoproliferative disorder, HL - Hodgkin's lymphoma, SBL - small B cell lymphoma, DLBCL - diffuse large B cell lymphoma                    | I, II, III, IV | Steinbrocker's classification: stage I - 1 patient stage II - 3 patients stage III - 3 patients stage IV - 13 patients                                                                                                                                              | PM - polymyositis with LPD                                                                                                      | 66.3 (SD 7.3)<br>Vs.<br>53 years                                                                            | 4/16<br>Vs.<br>0/1 | NR                | 11/19<br>Total<br>pLPD 6/6<br>HL 2/3<br>DLBCL 2/9<br>SBL 1/1 | 1/1 | biopsy                      | EBER<br>LMP1 and EBNA2                              | I - 3/11<br>II - 5/11<br>III - 3/11 | In situ hybridization<br>immunohistochemistry                  |
| Kameda T, 2014 [37]<br>Japan      | nested case-control | 28 | 125                                                             | DLBCL - diffuse large B cell lymphoma, MCL - mantle cell lymphoma, Unknown                                                                                       | I, II          | DAS28-CRP score at LPD onset was 2.26 (interquartile range 2.09–2.82)<br>Steinbrocker's classification: stage I - 1 LPD, 13 non-LPD patients, stage II - 7 LPD, 53 non-LPD patients, stage III - 10 LPD, 21 non-LPD patients, stage IV - 6 LPD, 22 non-LPD patients | RA patients treated with MTX who didn't develop LPD matched for age and sex                                                     | Mean 69.5 (range 52-92)<br>Vs.<br>Median 69.0 (range 63-75)                                                 | 9/19               | Yes (age and sex) | 7/12 Total<br>16/28 not tested                               |     | biopsy and peripheral blood | EBER, EBV DNA viral load                            | NR                                  | In situ hybridization, real-time PCR                           |
| Koens L, 2014 [38]<br>Netherlands | NR                  | 6  | 4                                                               | BCL - B cell lymphoma                                                                                                                                            | NR             | NR                                                                                                                                                                                                                                                                  | patients treated with MTX with DM - dermatomyositis, PA - psoriatic arthritis, MS - morbus still)                               | 77.7 (SD 11.5)<br>Vs.<br>68.7 (SD 8.6)                                                                      | 3/3<br>Vs.<br>1/3  | NR                | 2/6                                                          | 3/4 | biopsy                      | EBER, LMP1                                          | NR                                  | In situ hybridization, immunohistochemistry                    |
| Berghen N, 2015 [39]<br>Belgium   | prospective cohort  | 8  | 361 Total<br>26 with solid malignancy<br>335 without malignancy | NHL - non-Hodgkin's lymphoma, HL - Hodgkin's lymphoma, p-LPD - polymorphic lymphoproliferative disorder, MM - multiple myeloma, pre-T acute lymphocytic leukemia | NR             | DAS-28 score - mean 5.18 (median 5.10)                                                                                                                                                                                                                              | RA patients with solid malignancy treated with anti-TNF therapy<br>RA patients without malignancy treated with anti-TNF therapy | Mean 59 (range 38-72)<br>Vs.<br>Solid malignancy - Mean 58.7<br>No malignancy - Mean 51.5 (range 19.9-80.6) | NR                 | Yes (age)         | 3/4                                                          | NR  | biopsy                      | EBV DNA in blood?                                   | NR                                  | real-time PCR                                                  |
| Hashimoto K, 2015 [40]<br>Japan   | case-series         | 2  | NR                                                              | Both cases - Polymorphous B-cell LPD                                                                                                                             | NR             | NR                                                                                                                                                                                                                                                                  | NO CONTROL GROUP                                                                                                                | Case 1 - 74 years<br>Case 2 - 74 years                                                                      | 0/2                | NR                | 2/2 polymorphous B-cell LPD                                  | NR  | peripheral blood            | EBER<br>LMP1 and anti-EBV Abs<br>EBV DNA viral load | NR                                  | In situ hybridization<br>immunohistochemistry<br>real-time PCR |

|                                   |               |                                                                                  |                                                                                                         |                                                                                                                                                                                     |                |                                          |                                                                                                                                                                                                                                                                                                                    |                                                                                                                                                                 |                             |                   |                                       |                   |        |                   |                                                                                                                                           |                                                                                             |
|-----------------------------------|---------------|----------------------------------------------------------------------------------|---------------------------------------------------------------------------------------------------------|-------------------------------------------------------------------------------------------------------------------------------------------------------------------------------------|----------------|------------------------------------------|--------------------------------------------------------------------------------------------------------------------------------------------------------------------------------------------------------------------------------------------------------------------------------------------------------------------|-----------------------------------------------------------------------------------------------------------------------------------------------------------------|-----------------------------|-------------------|---------------------------------------|-------------------|--------|-------------------|-------------------------------------------------------------------------------------------------------------------------------------------|---------------------------------------------------------------------------------------------|
| Hollander P, 2015 [41]<br>Denmark | case-control  | 585 (data for EBV were available for 498)                                        | 3187                                                                                                    | HL - Hodgkin's lymphoma                                                                                                                                                             | NR             | NR                                       | Controls were randomly sampled from the entire Danish and Swedish populations using continuously updated computerized population registers. They were frequency matched to controls within each country on the expected age (in 10-year strata) and sex distributions of the combined group of HL and NHL patients | age ranges: 18-34 years 277 (47.3%)<br>35-54 years 171 (29.2%)<br>55-74 years 137 (23.4%)<br>vs.<br>18-34 312 (9.8%)<br>35-54 861 (27.0%)<br>55-74 2014 (63.2%) | 305/280<br>Vs.<br>1767/1420 | Yes (age and sex) | 142/487<br>HL<br>8/21 RA and HL cases | NR                | biopsy | EBER, LMP1        | NR                                                                                                                                        | In situ hybridization, immunohistochemistry                                                 |
| Inui Y, 2015 [42]<br>Japan        | retrospective | 20 Total<br>13 BCL<br>2 TCL<br>5 HL                                              | NR                                                                                                      | BCL - B cell lymphoma, TCL - T cell lymphoma, HL - Hodgkin's lymphoma                                                                                                               | I, II, III, IV | NR                                       | NO CONTROL GROUP                                                                                                                                                                                                                                                                                                   | Median 70 (range 53-77)                                                                                                                                         | 5/15                        | NR                | 5/20 Total                            | NR                | biopsy | EBER              | NR                                                                                                                                        | In situ hybridization                                                                       |
| Shimizu S, 2015 [43]<br>Japan     | NR            | 1                                                                                | 1                                                                                                       | DLBCL - Diffuse large B-cell lymphoma                                                                                                                                               | NR             | NR                                       | dermatomyositis and Sjögren's syndrome LPD patient                                                                                                                                                                                                                                                                 | Individual data<br>74<br>Vs<br>63 years                                                                                                                         | 1/0<br>Vs.<br>0/1           | NR                | 1                                     | 1                 | biopsy | EBER              | NR                                                                                                                                        | In situ hybridization                                                                       |
| Yamada K, 2015 [44]<br>Japan      | NR            | 61 Total<br>42 BCL<br>40 DLBCL<br>1 FL<br>1 MCL<br>7 HL<br>12 T/NK cell lymphoma | 35 Total<br>31 BCL<br>24 DLBCL<br>6 MZL<br>1 lymphoplasmacytic lymphoma<br>2 HL<br>2 T/NK cell lymphoma | BCL - B cell lymphoma, DLBCL - diffuse large B cell lymphoma, FL - follicular lymphoma, MCL - mantle cell lymphoma, HL - Hodgkin's or Hogkin like lymphoma, T/NK cell type lymphoma | I, II, III, IV | NR                                       | RA-LPD patients not treated with MTX (BCL - B cell lymphoma, DLBCL - diffuse large B cell lymphoma, MZL - marginal zone lymphoma, Lymphoplasmacytic lymphoma, HL - Hodgkin's or Hogkin like lymphoma, and T/NK cell type lymphoma)                                                                                 | Median 65 (range 53-84)<br>Vs.<br>Median 67 (range 41-88)                                                                                                       | 12/49<br>Vs.<br>7/28        | NR                | 25/40<br>MTX-BLPD                     | 2/24 non-MTX BLPD | biopsy | EBER, LMP1, EBNA2 | I - 2/25<br>MTX-BLDP<br>18/25<br>MTX-BLDP<br>III - 5/25<br>MTX-BLDP<br>II - 2/2<br>non-MTX<br>BLDP<br>lytic<br>infection<br>7/25 MTX-BLDP | In situ hybridization, immunohistochemistry, ZEBRA-positive tumor cells (for IyC infection) |
| Jeon YW, 2016 [45]<br>Korea       | NR            | 4                                                                                | 7                                                                                                       | NHL - non-Hodgkin's lymphoma, DLBCL - diffuse large B cell lymphoma, MALT lymphoma, extranodal T/NK cell lymphoma                                                                   | NR             | CRP<br>0.79 (0.41-2.96) median (min-max) | non-RA (SS - Sjogren syndrome, Behcet disease, AS - ankylosing spondylitis, SLE - systemic lupus erythematosus), related non-Hodgkin's lymphoma patients (DLBCL - diffuse large B cell lymphoma, MALT lymphoma, FL - follicular lymphoma, plasmablastic lymphoma)                                                  | 65.5 (SD 5.9)<br>Vs.<br>49.9 (SD 11.2)                                                                                                                          | 2/2<br>Vs.<br>3/4           |                   | 1/4                                   | 1/7               | biopsy | EBER              | NR                                                                                                                                        | In situ hybridization                                                                       |

|                                 |                 |                                                                                                    |                                                                                                                                    |                                                                                                                                                                                                                                                                 |                |                                                |                                                                                                                                                                                                                     |                                                                                                                                                                                                      |               |                |                                                           |                                                                                                                                          |                             |                   |                                                                                                                   |                                             |
|---------------------------------|-----------------|----------------------------------------------------------------------------------------------------|------------------------------------------------------------------------------------------------------------------------------------|-----------------------------------------------------------------------------------------------------------------------------------------------------------------------------------------------------------------------------------------------------------------|----------------|------------------------------------------------|---------------------------------------------------------------------------------------------------------------------------------------------------------------------------------------------------------------------|------------------------------------------------------------------------------------------------------------------------------------------------------------------------------------------------------|---------------|----------------|-----------------------------------------------------------|------------------------------------------------------------------------------------------------------------------------------------------|-----------------------------|-------------------|-------------------------------------------------------------------------------------------------------------------|---------------------------------------------|
| Watanabe S, 2016 [46] Japan     | retrospective   | 13                                                                                                 | 2                                                                                                                                  | FL - follicular lymphoma, DLBCL - diffuse large B cell lymphoma, MALT lymphoma, polymorphic BLPD, MZL - marginal zone lymphoma                                                                                                                                  | I, II, III, IV | NR                                             | PN (polyarteritis nodosa) and PA (psoriatic arthritis) patient, with LPD (DLBCL) treated with MTX                                                                                                                   | Range 40-70 Vs. 50-60                                                                                                                                                                                | NR            | NR             | 5/13                                                      | 2/2                                                                                                                                      | biopsy                      | EBER              | NR                                                                                                                | in situ hybridization                       |
| Carroll M, 2017 [47] Australia  | case-series     | 2                                                                                                  | NR                                                                                                                                 | Case 1 - Extranodal NK/T-cell lymphoma<br>Case 2 - Plasmablastic lymphoma                                                                                                                                                                                       | NR             | NR                                             | NO CONTROL GROUP                                                                                                                                                                                                    | Case 1 - 80 years<br>Case 2 - 79 years                                                                                                                                                               | 1/1           | NR             | 1                                                         | NR                                                                                                                                       | biopsy                      | EBER              | NR                                                                                                                | in situ hybridization                       |
| Ejima-Yamada K, 2017 [48] Japan | NR              | 49                                                                                                 | 22 Total<br>10 EBV+<br>DLBCL who had no history of RA, HIV infection, or transplants<br>12 RA patients with reactive lymphadenitis | B cell LPDs, DLBCL - diffuse large B cell lymphoma                                                                                                                                                                                                              | I, II, III, IV | NR                                             | Age- and sex-matched control patients with DLBCL (EBV- DLBCL non-germinal center B cell phenotype, EBV+ DLBCL) who had no history of RA, HIV infection, or transplants, and RA patients with reactive lymphadenitis | RA-LPD MTX median 68 (range 50-84)<br>EBV+ RA-LPD MTX median 68 (range 56-82)<br>EBV- RA-LPD MTX median 66 (range 50-84)<br>RA-LPD non-MTX median 65 (range 41-88)<br>Vs.<br>Median 64 (range 38-90) | 8/41 Vs. 6/15 | Yes (age, sex) | 21/38 RA related MTX-BLPD                                 | 15/44 (22 with EBV- DLBCL 10 EBV+ DLBCL who had no history of RA, HIV infection, or transplant 12 RA patients with related lymphadenitis | biopsy                      | EBER, LMP1, EBNA2 | I - 5/12 RA patients with related lymphadenitis<br>II - 17/21 RA-related MTX-BLPD<br>III- 4/21RA-related MTX-BLPD | in situ hybridization, immunohistochemistry |
| Katsuyama T, 2017 [49] Japan    | retrospective   | 30 Total<br>16 DLBCL<br>2 AITL<br>2 MZBL<br>1 HL<br>2 MALT<br>1 NK/T cell<br>1 PTCL-NOS<br>3 other | NR                                                                                                                                 | DLBCL - diffuse large B cell lymphoma, AITL - angioimmunoblastic T-cell lymphoma, MZBL - marginal zone B-cell lymphoma, MALT - mucosa associated lymphoid tissue, HL - Hodgkin's lymphoma, PTCL-NOS - peripheral T-cell lymphoma not otherwise specified, other | NR             | CRP 3.49 (SD 5.70)                             | NO CONTROL GROUP                                                                                                                                                                                                    | 68.2 (SD 9.7)                                                                                                                                                                                        | 5/25          | NR             | 9/12 EBV DNA<br>17/23 EBER                                | NR                                                                                                                                       | biopsy and peripheral blood | EBER; EBV DNA     | NR                                                                                                                | in situ hybridization; PCR                  |
| Gion Y, 2017 [50] Japan         | NR              | 51 Total<br>34 DLBCL<br>17 HL                                                                      | NR                                                                                                                                 | DLBCL - diffuse large B cell lymphoma, HL - Hodgkin's lymphoma                                                                                                                                                                                                  | I, II, III, IV | NR                                             | NO CONTROL GROUP                                                                                                                                                                                                    | Median 67 (range 45-84)                                                                                                                                                                              | 14/37         | NR             | 28/34 DLBCL EBER<br>HL: 14/17 EBER, 0/11 EBNA2, 8/13 Imp1 | NR                                                                                                                                       | biopsy                      | EBER; EBNA2; LMP1 | I - 2<br>II - 6<br>III - 0                                                                                        | in situ hybridization; immunohistochemistry |
| Takanashi S, 2017 [51] Japan    | cross-sectional | 26                                                                                                 | NR                                                                                                                                 | BCL - B-cell lymphoma, TCL - T-cell lymphoma, HL - Hodgkin's lymphoma, Reactive hyperplasia                                                                                                                                                                     | I, II, III, IV | ECOG PS 0-1 77%<br>2-4 23%<br>CRP 2.5 (0.1-28) | NO CONTROL GROUP                                                                                                                                                                                                    | Median 67 (range 30-91)                                                                                                                                                                              | 3/23          | NR             | 7/9                                                       | NR                                                                                                                                       | biopsy                      | NR                | NR                                                                                                                | MEDICAL RECORD/HISTORY                      |

|                                                                                    |                     |    |    |                                                                                                                                                                                                                                                                                                                                                                                                                              |                |                                                                                                                                                                                                                                                                                                              |                                                                                                                                                                |                                                           |                      |                                                     |                                                                                                                                                          |    |        |                   |                                                                 |                                             |
|------------------------------------------------------------------------------------|---------------------|----|----|------------------------------------------------------------------------------------------------------------------------------------------------------------------------------------------------------------------------------------------------------------------------------------------------------------------------------------------------------------------------------------------------------------------------------|----------------|--------------------------------------------------------------------------------------------------------------------------------------------------------------------------------------------------------------------------------------------------------------------------------------------------------------|----------------------------------------------------------------------------------------------------------------------------------------------------------------|-----------------------------------------------------------|----------------------|-----------------------------------------------------|----------------------------------------------------------------------------------------------------------------------------------------------------------|----|--------|-------------------|-----------------------------------------------------------------|---------------------------------------------|
| Mariette X, 2018 [52]<br>Multicenter<br>(Germany, Korea, USA, Netherlands, Canada) | nested case-control | 19 | 76 | HL - Hodgkin's lymphoma, B-cell chronic lymphocytic leukemia/ small lymphocytic lymphoma, Malignant lymphoma<br>nHL - non-Hodgkin's lymphoma, FL - follicular lymphoma, DLBCL - diffuse large B cell lymphoma, Small B lymphocytic lymphoma, MALT - marginal zone B cell lymphoma                                                                                                                                            | NR             | DAS28-4(ESR) for cases - 6.1±1.3, for controls - 6.3±1.1 at baseline and for cases - 3.6±1.0, controls - 3.5±1.1 at the time lymphoma was reported<br>HAQ-DI score for cases - 1.2±0.6, for controls - 1.5±0.7 at baseline and for cases - 0.9±0.6, for controls - 0.8±0.7 at the time lymphoma was reported | Patients without malignancy from the same analysis population, individually matched for age (at time of lymphoma event) and gender (case to control ratio 1:4) | Median 60 (range 42-76)<br>Vs.<br>Median 60 (range 42-76) | 4/15<br>Vs.<br>16/60 | Yes (age and sex with case to control ratio of 1:4) | 3/13 (1-HL; 2-BCL)                                                                                                                                       | NR | biopsy | NR                | NR                                                              | In situ hybridization; immunohistochemistry |
| Tsukui D, 2018 [53]<br>Japan                                                       | retrospective       | 20 | NR | Polymorphic LPD, DLBCL - diffuse large B cell lymphoma, HL - Hodgkin's lymphoma, HL-like - Hodgkin-like lymphoma, Peripheral T-cell lymphoma                                                                                                                                                                                                                                                                                 | NR             | CRP 2.51 (0.05-22.02)<br>Median (range)<br>Steinblocker stage: II 16%, III 37%, IV 47%                                                                                                                                                                                                                       | NO CONTROL GROUP                                                                                                                                               | Median 70.5 (range 52-84)                                 | 1/19                 | NR                                                  | 13/20<br>EBER 4/20<br>EBV dna                                                                                                                            | NR | biopsy | EBER              | NR                                                              | In situ hybridization; PCR DNA              |
| Tokuhiro M, 2018 [54]<br>Japan                                                     | NR                  | 59 | NR | EBV+ DLBCL - EBV+ diffuse large B cell lymphoma, DLBCL-NOS - diffuse large B cell lymphoma not otherwise specified, HL - Hodgkin's lymphoma, LPD - lymphoproliferative disorder, FL - follicular lymphoma, PTCL-NOS - peripheral T cell lymphoma not otherwise specified, MALT - marginal zone lymphoma of mucosal associated lymphoid tissue, PMLBCL - primary mediastinal large B cell lymphoma, Plasmablastic, Other LPDs | I, II, III, IV | NR                                                                                                                                                                                                                                                                                                           | NO CONTROL GROUP                                                                                                                                               | Mean 65.8 (range 39-88)                                   | 21/41                | NR                                                  | Total 27/55<br>14/25<br>DLBCL<br>8/10 HL<br>4/7 LPD<br>0/4 FL<br>0/4 PTCL-NOS<br>0/2 MALT<br>0/1<br>PMLBCL<br>0/1<br>Plasmablastic<br>3/5 others<br>LPDs | NR | biopsy | EBER              | NR                                                              | In situ hybridization                       |
| Carreras J, 2018 [55]<br>Japan                                                     | NR                  | 20 | NR | DLBCL - diffuse large B cell lymphoma                                                                                                                                                                                                                                                                                                                                                                                        | NR             | Low activity in 94% (method not reported)<br>ECOG PS≥2 11%<br>High CRP 58%                                                                                                                                                                                                                                   | NO CONTROL GROUP                                                                                                                                               | Median 70 (range 44-81)                                   | 4/16                 | NR                                                  | 13/20 (65%)                                                                                                                                              | NR | biopsy | EBER, LMP1, EBNA2 | 0-7/20 (35%)<br>I-3/20 (15%)<br>II-6/20 (30%)<br>III-4/20 (20%) | In situ hybridization; immunohistochemistry |

|                                  |                               |                                                                      |                                                                    |                                                                                                                                                                                                                                                           |                |                                                                                                                                           |                                                                                                                                                                                                                 |                                                                                                                                                                         |                     |                                                                 |                                                                          |                  |                                                  |                   |                                                                                                                                                     |                                             |
|----------------------------------|-------------------------------|----------------------------------------------------------------------|--------------------------------------------------------------------|-----------------------------------------------------------------------------------------------------------------------------------------------------------------------------------------------------------------------------------------------------------|----------------|-------------------------------------------------------------------------------------------------------------------------------------------|-----------------------------------------------------------------------------------------------------------------------------------------------------------------------------------------------------------------|-------------------------------------------------------------------------------------------------------------------------------------------------------------------------|---------------------|-----------------------------------------------------------------|--------------------------------------------------------------------------|------------------|--------------------------------------------------|-------------------|-----------------------------------------------------------------------------------------------------------------------------------------------------|---------------------------------------------|
| Daroontu m T, 2018 [56]<br>Japan | NR                            | 6                                                                    | 1                                                                  | EBV+ MCU - EBV+ mucocutaneous ulcer (B cell LPD)                                                                                                                                                                                                          | I, II, III, IV | NR                                                                                                                                        | SS - Sjogren syndrome with LPD (EBV+ mucocutaneous ulcer)                                                                                                                                                       | 75.3 (SD 8.4)<br>Vs.<br>72 years                                                                                                                                        | 1/5<br>Vs.<br>0/1   | NR                                                              | 6/6                                                                      | 1/1              | biopsy                                           | EBER              | NR                                                                                                                                                  | in situ hybridization                       |
| Gong S, 2018 [57]<br>USA         | NR                            | 2                                                                    | 8                                                                  | Marginal zone lymphoma                                                                                                                                                                                                                                    | NR             | NR                                                                                                                                        | Marginal zone lymphoma with history of other diseases than RA                                                                                                                                                   | Median 58.5 (range 54-63)<br>Vs.<br>Median 48 (range 18-78)                                                                                                             | 0/2<br>Vs.<br>4/4   | NR                                                              | 2/2                                                                      | 8/8              | biopsy                                           | EBER, LMP1, EBNA2 | I - 2/2 i<br>4/6 in controls<br>II- 0/2 i<br>2/6 in controls                                                                                        | in situ hybridization; immunohistochemistry |
| Marcelis L, 2018 [58]<br>Belgium | NR                            | 28                                                                   | 47                                                                 | HL - Hodgkin's lymphoma, NHL - non-Hodgkin's lymphoma, Polymorphic B-cell LPD, Non-destructive LPD, Unclassifiable                                                                                                                                        | I, II, III, IV | NR                                                                                                                                        | LPD patients with other underlying diseases (Crohn's disease, Ulcerative colitis, Juvenile idiopathic arthritis, Sjogren syndrome, Systemic lupus erythematosus, other)                                         | NR                                                                                                                                                                      | NR                  | NR                                                              | 7                                                                        | NR               | biopsy                                           | EBER              | NR                                                                                                                                                  | in situ hybridization                       |
| Saito S, 2018 [59]<br>Japan      | retrospective and prospective | 35 Total<br>25 from retrospective study<br>10 from prospective study | 35 Total<br>25 for retrospective study<br>10 for prospective study | HL - Hodgkin's lymphoma, DLBCL - diffuse large B cell lymphoma, FL - follicular lymphoma, lymphomatoid granulomatosis, MALT - mucosa associated lymphoid tissues lymphoma, NK/T cell lymphoma, reactive hyperplasia, LPD with atypical cell proliferation | I, II, III, IV | CRP<br>Median (range)<br>in regressive group 1.48 (0.26-2.88)<br>in persistent group 0.9 (0.11-2.20)<br>in control group 0.08 (0.03-0.47) | RA patients without LPD treated with MTX matched for age, sex, MTX dose, and RA duration (LPD:control = 1:1)<br>RA patients without LPD treated with MTX clinically matched for age, sex, MTX dose, RA duration | Regressive group median 67 (range 58-73)<br>Persistent group median 67 (range 64-71)<br>Vs.<br>Median 67 (range 64-71)                                                  | 4/31<br>Vs.<br>4/31 | Yes (age, sex, MTX dose, and RA duration with LPD:Controls=1:1) | 20/30<br>Total 5/10 prospective study                                    | peripheral blood | EBER, EBV DNA viral load (za prospektivnu grupu) | NR                | in situ hybridization real-time PCR (prospective group)                                                                                             |                                             |
| Takanashi S, 2018 [60]<br>Japan  | NR                            | 18                                                                   | NR                                                                 | BCL- B-cell lymphoma, TCL - T-cell lymphoma, HL - Hodgkin's lymphoma                                                                                                                                                                                      | I, II, III, IV | CRP 4.5 (0.2-28) mean (range)                                                                                                             | NO CONTROL GROUP                                                                                                                                                                                                | Median 66 (range 54-79)                                                                                                                                                 | 2/16                | NR                                                              | 7/9                                                                      | NR               | biopsy                                           | N/A               | NR                                                                                                                                                  | N/A                                         |
| Kurita D, 2019 [61]<br>Japan     | NR                            | 219                                                                  | NR                                                                 | RH - reactive lymphoid hyperplasia, Poly-LPDs - polymorphic LPDs, B/T-cell non-Hodgkin's lymphoma, DLBCL - diffuse large B cell lymphoma, indolent B-cell lymphoma, PTCL - peripheral T-cell lymphoma, HL - Hodgkin's lymphoma                            | I, II, III, IV | CRP high in 131 patients                                                                                                                  | NO CONTROL GROUP                                                                                                                                                                                                | RH median 63 (range 26-81)<br>Poly-LPD median 68 (range 42-83)<br>DLBCL median 69 (range 39-88)<br>Indolent-BCL median 66 (range 49-78)<br>PTCL median 70 (range 56-85) | 55/129              | NR                                                              | 108/193 total<br>16/29 RH<br>23/32 Poly-LPD<br>48/106 DCBCL<br>20/26 CHL | NR               | biopsy                                           | EBER, LMP1, EBNA2 | DCBCL: 0 or I - 5/42<br>II- 27/42<br>III -10/42<br>CHL: 0 or I - 2/18<br>II-16/18<br>III -0/18<br>Poly-LPD: 0 or I - 1/10<br>II - 8/10<br>III- 1/10 | in situ hybridization, immunohistochemistry |

|                                 |             |                                               |    |                                                                                                                                                                                                                                                                 |                |                                                                               |                                                                                                            |                                                                                                       |                     |    |                                                                                                        |     |        |                   |                             |                                             |
|---------------------------------|-------------|-----------------------------------------------|----|-----------------------------------------------------------------------------------------------------------------------------------------------------------------------------------------------------------------------------------------------------------------|----------------|-------------------------------------------------------------------------------|------------------------------------------------------------------------------------------------------------|-------------------------------------------------------------------------------------------------------|---------------------|----|--------------------------------------------------------------------------------------------------------|-----|--------|-------------------|-----------------------------|---------------------------------------------|
| Satou A, 2019a [62]<br>Japan    | case series | 9                                             | NR | DLBCL - diffuse large B cell lymphoma, EBVMCU - EBV+ mucocutaneous ulcer, HL - Hodgkin's lymphoma, polymorphic LPD, HL-like LPD - Hodgkin's like lymphoma, TCL - T-cell lymphoma                                                                                | NR             | DAS28-CRP moderate (2.7-4.1) n=6 low (<2.7) n=1 clinical remission (<2.3) n=2 | NO CONTROL GROUP                                                                                           | Median 75 (range 48-87)                                                                               | 4/5                 | NR | 9/9                                                                                                    | NR  | biopsy | EBER, LMP1, EBNA2 | I - 1/8<br>II - 7/8         | In situ hybridization, immunohistochemistry |
| Satou A, 2019b [63]<br>Japan    | NR          | 61                                            | NR | BCL - B-cell lymphoma, TCL - T-cell lymphoma                                                                                                                                                                                                                    | III/IV         | NR                                                                            | NO CONTROL GROUP                                                                                           | RA-LPD TCL - median 70 (range 56-85)<br>RA-LPD BCL - median 68 (range 47-82)                          | 25/36               | NR | Total 21/61<br>1/28 MTX T cell LPD<br>20/33 MTX B cell LPD                                             | NR  | biopsy | EBER              | NR                          | In situ hybridization                       |
| Yoshifuji K, 2019 [64]<br>Japan | NR          | 6                                             | NR | HL - Hodgkin's lymphoma                                                                                                                                                                                                                                         | NR             | NR                                                                            | NO CONTROL GROUP                                                                                           | Median 58 (range 48-72)                                                                               | 2/4                 | NR | 5/6                                                                                                    | NR  | biopsy | EBER              | NR                          | In situ hybridization                       |
| Fujimoto K, 2020 [65]<br>Japan  | NR          | 81                                            | NR | DLBCL - diffuse large B cell lymphoma, polymorphic LPD, HL - Hodgkin's lymphoma, mantle cell lymphoma, lymphoplasmacytic lymphoma, FL - follicular lymphoma, peripheral T-cell lymphoma, enteropathy-associated T-cell lymphoma, anaplastic large cell lymphoma | I, II, III, IV | NR                                                                            | NO CONTROL GROUP                                                                                           | Median 69 (range 35-87)                                                                               | 26/55               | NR | 29/67 Total EBER<br>DLBCL 17/45<br>HL 5/6<br>polymorphic LPD 6/10<br>1/6 others<br>18/24 Total EBV DNA | NR  | biopsy | EBER; EBV DNA     | NR                          | In situ hybridization; pcr                  |
| Ikeda T, 2020 [66]<br>Japan     | NR          | 29 EBVMCU                                     | 5  | DLBCL - diffuse large B cell lymphoma, EBVMCU - EBV+ mucocutaneous ulcer                                                                                                                                                                                        | NR             | NR                                                                            | immunosuppressed patients of different causes than RA therapy, (age, polycythemia, polymyalgia rheumatica) | 73.21 (SD 8.15)<br>Vs.<br>74.2 (SD 4.66)                                                              | 12/17<br>Vs.<br>4/1 | NR | 29/29                                                                                                  | 5/5 | biopsy | EBER              | NR                          | In situ hybridization                       |
| Kohno K, 2020 [67]<br>Japan     | NR          | 45 Total<br>9 HL<br>15 DLBCL<br>21 poly-B-LPD | NR | HL - Hodgkin's lymphoma, DLBCL - diffuse large B cell lymphoma, Poly-B-LPD - polymorphic B-cell LPD, Other                                                                                                                                                      | I, II, III, IV | NR                                                                            | NO CONTROL GROUP                                                                                           | HL median 68 (range 48-82)<br>DLBCL - median 68 (range 53-82)<br>Poly-B-LPD - median 68 (range 39-80) | 17/28               | NR | 30/45 Total<br>8/9 HL<br>6/15 DLBCL<br>16/21 poly-B-LPD                                                | NR  | biopsy | EBER              | I - 2<br>II - 16<br>III - 2 | In situ hybridization                       |



|                                                                |             |    |                                                        |                                                                                                                                     |                |                                                                                                                    |                                                                                                                                                                                                                                                                                                                            |                                                                                                                                                                                                                               |                    |    |                                                                                                                      |                                                                                                |        |                                                  |                                    |                                                    |
|----------------------------------------------------------------|-------------|----|--------------------------------------------------------|-------------------------------------------------------------------------------------------------------------------------------------|----------------|--------------------------------------------------------------------------------------------------------------------|----------------------------------------------------------------------------------------------------------------------------------------------------------------------------------------------------------------------------------------------------------------------------------------------------------------------------|-------------------------------------------------------------------------------------------------------------------------------------------------------------------------------------------------------------------------------|--------------------|----|----------------------------------------------------------------------------------------------------------------------|------------------------------------------------------------------------------------------------|--------|--------------------------------------------------|------------------------------------|----------------------------------------------------|
| Laurent C, 2020 [68]<br>Multicenter (France, USA, UK, Germany) | NR          | 2  | 12 Total<br>7 none<br>3 other LPDs<br>2 other diseases | HL - Hodgkin's lymphoma                                                                                                             | NR             | NR                                                                                                                 | - LPD (Hodgkin's lymphoma) patients without history of any disease<br>- LPD (Hodgkin's lymphoma) patients with previous other LPDs (FL - follicular lymphoma, DLBCL - diffuse large B cell lymphoma, T-LGL leukemia)<br>- LPD (Hodgkin's lymphoma) patients with previous sarcoidosis, LCH - Langerhans cell histiocytosis | 42.5 (SD 23.33)<br>Vs.<br>47.5 (range 13-89)                                                                                                                                                                                  | 2/0<br>Vs.<br>8/4  | NR | 1/2                                                                                                                  | 6/11 Total<br>4/6 none<br>1/3 other LPDs<br>1/2 other diseases                                 | biopsy | EBER                                             | NR                                 | in situ hybridization                              |
| Matsubayashi S, 2020 [69]<br>Japan                             | case series | 2  | 1                                                      | DLBCL - diffuse large B cell lymphoma                                                                                               | NR             | NR                                                                                                                 | psoriasis and LPD patient treated with MTX                                                                                                                                                                                                                                                                                 | Median 69 (range 63-75)<br>Vs.<br>42 years                                                                                                                                                                                    | 0/2<br>Vs.<br>1/0  | NR | 1/2                                                                                                                  | 1/1                                                                                            | biopsy | EBER                                             | NR                                 | in situ hybridization                              |
| Shiraiwa S, 2020 [70]<br>Japan                                 | NR          | 48 | NR                                                     | EBVMCL - EBV-mucocutaneous lesions, DLBCL - diffuse large B cell lymphoma, Hodgkin-like lymphoma, HL - Hodgkin's lymphoma, Other    | I, II, III, IV | NR                                                                                                                 | NO CONTROL GROUP                                                                                                                                                                                                                                                                                                           | EBVMCL - gingival swelling median 79 (range 74-83)<br>EBVMCL - EBVMCU median 70 (range 55-90)<br>DLBCL median 69 (range 44-81)<br>HLL median 64 (range 51-70)<br>CHL median 63 (range 41-83)<br>Other median 68 (range 47-83) | 12/36              | NR | 37/48<br>EBER<br>28/37<br>LMP1<br>7/32<br>EBNA2                                                                      | NR                                                                                             | biopsy | EBER; LMP1; EBNA2                                | I - 4<br>II - 21<br>III - 7        | in situ hybridization, immunohistochemistry        |
| Tokuhiro M, 2020 [71]<br>Japan                                 | NR          | 33 | NR                                                     | DLBCL - diffuse large B cell lymphoma, HL -Hodgkin's lymphoma LPDs                                                                  | NR             | NR                                                                                                                 | NO CONTROL GROUP                                                                                                                                                                                                                                                                                                           | Median 65 (range 36-86)                                                                                                                                                                                                       | 13/20              | NR | 9/33                                                                                                                 | NR                                                                                             | biopsy | EBER                                             | NR                                 | in situ hybridization                              |
| Yamada C, 2020 [72]<br>Japan                                   | NR          | 19 | 10                                                     | HL - Hodgkin's lymphoma, DLBCL - diffuse large B cell lymphoma, FL - follicular lymphoma, AITL - angioimmunoblastic T cell lymphoma | NR             | DAS28-CRP Median (range) 2.67 (1.05-10.7) for all RA<br>3.63 (2.23-5.75) for RA-RLH<br>2.59 (1.05-10.7) for RA-LPD | RA-RLH (reactive lymph node hyperplasia)                                                                                                                                                                                                                                                                                   | Median 59 (range 31-72)<br>Vs.<br>Median 68 (range 47-84)                                                                                                                                                                     | 9/10<br>Vs.<br>4/6 | NR | 11/19<br>EBER<br>10/11<br>Imp1<br>1/11<br>EBNA2<br>9/13 EA IgG<br>2/14 VCA IgM<br>13/14 VCA IgG<br>11/12<br>EBNA IgG | 1/10 EBER<br>0/1 Imp1<br>0/1 EBNA2<br>2/3 EA IgG<br>2/3 VCA IgM<br>3/3 VCA IgG<br>3/3 EBNA IgG | biopsy | EA IgG, VCA IgM IgG, EBNA IgG; EBER, LMP1, EBNA2 | I - 3/12<br>II - 9/1<br>III - 1/11 | ELISA, in situ hybridization, immunohistochemistry |

|                                |                             |                                                                                                                                                                                                                                                                                                                        |    |                                                                                                                                                                                                                                                                                                                                                                                              |        |                                                                                                                                                                                                    |                  |                                                                                                    |        |    |                                                                                |    |        |      |    |                       |
|--------------------------------|-----------------------------|------------------------------------------------------------------------------------------------------------------------------------------------------------------------------------------------------------------------------------------------------------------------------------------------------------------------|----|----------------------------------------------------------------------------------------------------------------------------------------------------------------------------------------------------------------------------------------------------------------------------------------------------------------------------------------------------------------------------------------------|--------|----------------------------------------------------------------------------------------------------------------------------------------------------------------------------------------------------|------------------|----------------------------------------------------------------------------------------------------|--------|----|--------------------------------------------------------------------------------|----|--------|------|----|-----------------------|
| Kondo M, 2021 [73]<br>Japan    | retrospective observational | 12                                                                                                                                                                                                                                                                                                                     | NR | DLBCL - diffuse large B cell lymphoma, TCL - T cell lymphoma, HL - Hodgkin's lymphoma, MALT - mucosa-associated lymphoid tissue lymphoma                                                                                                                                                                                                                                                     | NR     | DAS28-ESR<br>2.67±0.78 mean for 11 patients (1 not evaluated)<br>CRP<br>2.26 mean for all 12 patients                                                                                              | NO CONTROL GROUP | 68.1 (SD 9.3)                                                                                      | 7/5    | NR | 6/11                                                                           | NR | biopsy | EBER | NR | In situ hybridization |
| Kuramoto N, 2021 [74]<br>Japan | NR                          | 216 Total<br>71 DLBCL<br>20HL<br>12 Reactive lymphoid hyperplasia<br>9<br>Unclassifiable B cell lymphoma<br>8 FL<br>6 MZL<br>5 Hodgkin-like<br>4 peripheral T-cell lymphoma<br>3 lymphomatoid granulomatosis<br>2 composite lymphoma<br>2 poly-LPDs<br>1 lymphoplasmacytic lymphoma<br>1 extranodal NK/T cell lymphoma | NR | DLBCL - diffuse large B cell lymphoma, HL - Hodgkin's lymphoma, EBV/MCU - EBV+ mucocutaneous ulcer, Reactive lymphoid hyperplasia, Unclassifiable B cell lymphoma, MZL - marginal zone lymphoma, Hodgkin-like lymphoma, Peripheral T-cell lymphoma, Lymphomatoid granulomatosis, Composite lymphoma, Poly-LPDs - polymorphic LPDs, Lymphoplasmacytic lymphoma, Extranodal NK/T cell lymphoma | III/IV | DAS28-CRP<br>Median (range)<br>2.92 (2.05-3.78)<br>DAS28-ESR<br>3.52 (2.76-4.80)<br>CDAI<br>6.0 (1.9-12.5)<br>SDAI<br>8.4 (3.0-19.1)<br>CRP<br>4.54 (1.48-5.00)                                    | NO CONTROL GROUP | Median 67 (range 60-73)                                                                            | 50/166 | NR | 42/136 total                                                                   | NR | biopsy | EBER | NR | In situ hybridization |
| Nakano K, 2021 [75]<br>Japan   | NR                          | 51                                                                                                                                                                                                                                                                                                                     | NR | DLBCL - diffuse large B cell lymphoma, HL - Hodgkin's lymphoma, Poly-LPD - polymorphic LPD, plasmablastic lymphoma, B-cell lymphoma, FL - follicular lymphoma, MALT - mucosa-associated lymphoid tissue lymphoma, reactive lymphadenitis, Other                                                                                                                                              | III/IV | DAS28-ESR<br>median (range)<br>4.2 (2.9-5.1) in regressive patients<br>3.6 (3.0-5.6) in persistent patients<br>CRP<br>2.3 (0.3-4.6) in regressive patients<br>1.9 (0.7-8.3) in persistent patients | NO CONTROL GROUP | Regressive group - median 66.5 (range 34.7-74.0)<br>Persistent group - median 67 (range 62.5-73.5) | 12/39  | NR | Total 19/51<br>7/26 regressive LPDs patients<br>12/25 persistent LPDs patients | NR | biopsy | EBER | NR | In situ hybridization |

|                                |             |                                                                                                                                                                                                                                                                                                                                                                                                         |    |                                                                                                                                                                                                                                                                                                                                                                                                                                                               |                |                                                                                                                                      |                                                       |                                                           |                        |    |                                                                                                                                   |    |        |      |    |                       |
|--------------------------------|-------------|---------------------------------------------------------------------------------------------------------------------------------------------------------------------------------------------------------------------------------------------------------------------------------------------------------------------------------------------------------------------------------------------------------|----|---------------------------------------------------------------------------------------------------------------------------------------------------------------------------------------------------------------------------------------------------------------------------------------------------------------------------------------------------------------------------------------------------------------------------------------------------------------|----------------|--------------------------------------------------------------------------------------------------------------------------------------|-------------------------------------------------------|-----------------------------------------------------------|------------------------|----|-----------------------------------------------------------------------------------------------------------------------------------|----|--------|------|----|-----------------------|
| Takada H, 2021 [76]<br>Japan   | case series | 195 Biopsy confirmed LPDs<br>79 DLBCL<br>21 HL<br>15 EBVMCU<br>12 Reactive lymphoid hyperplasia<br>11 Unclassifiable B cell lymphoma<br>10 FL<br>9 MZL<br>5 Hodgkin-like<br>4 peripheral T-cell lymphoma<br>3 lymphomatoid granulomatosis<br>2 angioimmunoblastic T-cell lymphoma<br>2 composite lymphoma<br>2 Poly-LPDs<br>1 Extranodal NK/T cell lymphoma<br>1 lymphoplasmacytic lymphoma<br>18 Other | 37 | DLBCL - diffuse large B cell lymphoma, HL - Hodgkin's lymphoma, EBVMCU - EBV+ mucocutaneous ulcer, Reactive lymphoid hyperplasia, Unclassifiable B cell lymphoma, MZL - marginal zone lymphoma, HLL - Hodgkin-like lymphoma, PTCL and AITL - Peripheral T-cell lymphoma, Lymphomatoid granulomatosis, Angioimmunoblastic T-cell lymphoma, Composite lymphoma, Poly-LPDs - polymorphic LPDs, Extranodal NK/T cell lymphoma, Lymphoplasmacytic lymphoma, Others | I, II, III, IV | DAS28-CRP med (IQR)<br>2.92 (2.05-3.78) for all patients<br>3.01 (2.06-3.83) biopsy confirmed LPDs<br>2.85 (1.98-3.25) clinical LPDs | RA patients with clinical LPDs (biopsy not confirmed) | Median 67 (range 60-73)<br>Vs.<br>Median 66 (range 59-72) | 43/152<br>Vs.<br>10/27 | NR | 74/136<br>Total<br>19/50<br>DLBCL<br>14/18 CHL<br>15/15<br>EBVMCU<br>6/10 RLH<br>0/2 FL<br>1/4 MZL<br>1/5 PTCL<br>AITL<br>5/5 HLL | NR | biopsy | EBER | NR | In situ hybridization |
| Fujimoto M, 2021 [65]<br>Japan | NR          | 2                                                                                                                                                                                                                                                                                                                                                                                                       | 11 | EBVMCU                                                                                                                                                                                                                                                                                                                                                                                                                                                        | NR             | NR                                                                                                                                   | EBVMCU with no immunosuppression th                   | over 70 years<br>Vs.<br>over 70 years                     | NR                     |    | 2                                                                                                                                 | 11 | biopsy |      |    | NR                    |
| He J, 2021 [77]<br>Australia   | case series | 2                                                                                                                                                                                                                                                                                                                                                                                                       | NR | Case 1 - HL - Hodgkin's lymphoma<br>Case 2 - Lymphomatoid granulomatosis                                                                                                                                                                                                                                                                                                                                                                                      | NR             | NR                                                                                                                                   | NO CONTROL GROUP                                      | Case 1 - 74 years<br>Case 2 - 67 years                    | 1/1                    | NR | 2                                                                                                                                 | NR | biopsy | NR   | NR | PCR, staining         |

Abbreviations: WHO=World Health Organization, NR=not reported, LPD=lymphoproliferative disorder, RF=rheumatoid factor, ESR=Erythrocyte sedimentation rate

Table S2. Case reports

| Author     | Year | RA                                | Th                                               | EBV      | Age | Gender |
|------------|------|-----------------------------------|--------------------------------------------------|----------|-----|--------|
| Barry      | 2008 | Yes                               | MTX                                              | positive | 78  | M      |
| Abe        | 2018 | Yes                               | Prednisolone<br>Bucillamine<br>Infliximab<br>MTX | positive | 62  | F      |
| Acero      | 2006 | Yes                               | MTX<br>Sulfasalazine                             | positive | 79  | F      |
| Agarwal    | 2004 | Yes                               | NR                                               | NR       | 52  | F      |
| Agarwal    | 2008 | Yes                               | MTX                                              | NR       | 57  | F      |
| Andrade    | 2018 | Yes                               | MTX<br>Hydroxychloroquine<br>Etanercept          | positive | 56  | F      |
| Aoshima    | 2019 | Yes                               | MTX                                              | NR       | 65  | F      |
| Arai       | 2011 | Yes                               | MTX<br>Etanercept                                | NR       | NR  | NR     |
| Baba       | 2016 | Yes                               | MTX                                              | positive | 79  | F      |
| Baird      | 2002 | Yes                               | MTX                                              | NR       | 69  | F      |
| Bilen      | 2008 | Yes                               | DMARDs (MTX)<br>NSAIDs                           | negative | 53  | F      |
| Blanchart  | 2014 | Yes                               | MTX                                              | positive | 64  | F      |
| Booth      | 2018 | Yes                               | NR                                               | positive | 45  | M      |
| Boulemden  | 2009 | Not available, poster, conference |                                                  |          |     |        |
| Chen       | 2019 | Yes                               | MTX<br>Prednisolone<br>Hydroxychloroquine        | positive | 72  | F      |
| Chim       | 2006 | Yes                               | NSAID<br>MTX                                     | positive | 66  | M      |
| Chung      | 2020 | Yes                               | MTX                                              | negative | 65  | M      |
| Clarke     | 2007 | Yes                               | MTX                                              | negative | 91  | F      |
| Claudino   | 2016 | Yes                               | MTX                                              | positive | 66  | F      |
| Craddock   | 2019 | Yes                               | MTX                                              | positive | 84  | F      |
| Craythorne | 2010 | Yes                               | MTX                                              | positive | 86  | F      |

|                     |      |               |                                                                         |          |         |   |
|---------------------|------|---------------|-------------------------------------------------------------------------|----------|---------|---|
| Cui                 | 2014 | Yes           | MTX                                                                     | not done | 55      | M |
| De Oliveira Terroso | 2014 | Yes           | MTX                                                                     | negative | 85      | M |
| Dedecker            | 2015 | Yes           | MTX                                                                     | positive | 78      | M |
| Derbyshire          | 2021 | Yes           | MTX                                                                     | positive | 69      | M |
| Duarte              | 2010 | Yes           | Prednisone<br>Sulindac                                                  | positive | 77      | F |
| Dunleavy            | 2017 | Yes           | NR                                                                      | positive | 85      | F |
| Ebeo                | 2003 | Yes           | MTX                                                                     | positive | 54      | M |
| febres-Aldana       | 2020 | Yes           | Etanercept<br>Tofacitinib<br>Golumumab                                  | positive | 71      | F |
| Ferraccioli         | 1995 | Yes           | Sulfasalazine<br>Azathioprine<br>Prednisone<br>MTX<br>Leukovorin<br>CSA | positive | 61      | M |
| Flipo               | 1997 | Not available |                                                                         |          |         |   |
| Fujimoto            | 2012 | Yes           | MTX<br>Prednisolone<br>Bucillamine                                      | positive | 36      | M |
| Fujiwara-Kuroda     | 2020 | Yes           | MTX                                                                     | positive | sixties | F |
| Gomyo               | 2003 | Yes           | MTX<br>NSAID<br>Parenteral gold<br>Corticosteroides                     | positive | 70      | F |
| Gono                | 2004 | Yes           | NSAID<br>Prednisolone<br>Salazosulphapyridine<br>MTX                    | negative | 59      | M |
| Gorodetskiy         | 2020 | Yes           | Gold<br>MTX<br>Leflunomide                                              | positive | 62      | F |
| Gru                 | 2019 | Yes           | MTX<br>Corticosteroides                                                 | positive | 71      | M |

|            |      |               |                                                                              |          |    |   |
|------------|------|---------------|------------------------------------------------------------------------------|----------|----|---|
| Hannequin  | 1998 | Yes           | MTX<br>Prednisone<br>Indomethacin                                            | NR       | 69 | F |
| Hashefi    | 2000 | Yes           | NR                                                                           | NR       | 63 | F |
| Hashimoto  | 2018 | Yes           | MTX                                                                          | positive | 67 | F |
| Hashizume  | 2012 | No            | Prednisolone<br>MTX                                                          | negative | 62 | F |
| Hasselblom | 2004 | Yes           | Prednisolone                                                                 | positive | 70 | F |
| Hatachi    | 2010 | Yes           | MTX                                                                          | positive | 75 | F |
| Hirose     | 2002 | Yes           | MTX                                                                          | positive | 53 | M |
| Horie      | 2015 | Yes           | MTX                                                                          | positive | 60 | M |
| Hyo        | 2011 | Yes           | MTX                                                                          | positive | 75 | M |
| Ikeda      | 2012 | Yes           | MTX<br>Adalimumab                                                            | positive | 71 | F |
| Inaba      | 2015 | Yes           | MTX<br>TNF inhibitor<br>(Etanercept, Infliximab,<br>Golimumab)               | positive | 39 | F |
| Inuzuka    | 2013 | Yes           | Prednisolone<br>MTX                                                          | positive | 64 | F |
| Ishida     | 2013 | Yes           | MTX<br>Infliximab                                                            | positive | 76 | F |
| Ishigaki   | 2018 | Yes           | MTX                                                                          | positive | 83 | F |
| Kaieda     | 2020 | Not available |                                                                              |          |    |   |
| Kaito      | 2021 | Yes           | MTX                                                                          | positive | 84 | F |
| Kakiuchi   | 2020 | Yes           | MTX,<br>Prednisolone<br>TAC                                                  | positive | 73 | M |
| Kameda     | 2007 | Yes           | Prednisolone,<br>Sulfasalazine<br>Actarit<br>DMARDs<br>Gold injection<br>MTX | positive | 71 | M |
| Kamekura   | 2010 | Yes           | MTX                                                                          | positive | 70 | F |

|           |      |     |                                                      |          |    |    |
|-----------|------|-----|------------------------------------------------------|----------|----|----|
| Kawahara  | 2015 | Yes | MTX                                                  | negative | 64 | M  |
| Kawano    | 2012 | Yes | MTX                                                  | negative | 60 | M  |
| Kawazoe   | 2020 | Yes | MTX                                                  | positive | 75 | M  |
| Kennedy   | 2006 | Yes | MTX<br>Hydroxychloroquine<br>Celecoxib<br>Folic acid | NR       | 64 | M  |
| Kikuchi   | 2010 | Yes | MTX                                                  | positive | 69 | F  |
| Kikuchi   | 2018 | Yes | MTX                                                  | positive | 73 | F  |
| Kobayashi | 2015 | Yes | Prednisolone<br>MTX                                  | positive | 71 | M  |
| Kobayashi | 2016 | Yes | Prednisolone<br>MTX                                  | positive | 78 | F  |
| Koji      | 2016 | Yes | MTX                                                  | positive | 48 | F  |
| Kojima    | 2006 | Yes | MTX                                                  | negative | 68 | F  |
| Komatsu   | 2013 | Yes | MTX                                                  | positive | 80 | F  |
| Komatsuda | 2008 | Yes | MTX<br>Prednisolone                                  | positive | 63 | F  |
| Ishida    | 2013 | Yes | MTX<br>Infliximab                                    | positive | 76 | F  |
| Kudoh     | 2014 | Yes | MTX                                                  | positive | 75 | F  |
| Kumar     | 2008 | Yes | MTX                                                  | positive | 56 | F  |
| Kurimoto  | 2016 | Yes | MTX                                                  | negative | 71 | F  |
| Kuroda    | 2014 | Yes | MTX                                                  | negative | 60 | M  |
| Lai       | 2017 | Yes | MTX                                                  | positive | 62 | F  |
| Le Goff   | 1998 | Yes | MTX                                                  | positive | NR | NR |
| Liote     | 1995 | Yes | MTX                                                  | positive | 57 | F  |
| Makino    | 2015 | Yes | MTX                                                  | positive | 47 | F  |

|              |      |     |                                                                     |          |    |   |
|--------------|------|-----|---------------------------------------------------------------------|----------|----|---|
| Makis        | 2017 | Yes | MTX                                                                 | negative | 67 | F |
| Maruani      | 2007 | Yes | MTX                                                                 | positive | 70 | F |
| Maruyama     | 2020 | Yes | MTX                                                                 | positive | 69 | F |
| Matsubayashi | 2019 | Yes | MTX                                                                 | NR       | 67 | F |
| Matsuda      | 2018 | Yes | MTX                                                                 | positive | 76 | F |
| Matsumoto    | 2001 | Yes | MTX                                                                 | positive | 63 | M |
| Matsumoto    | 2014 | Yes | MTX                                                                 | negative | 62 | M |
| Matsuzaki    | 2018 | Yes | Prednisolone<br>MTX                                                 | positive | 80 | F |
| McKelvie     | 2016 | Yes | MTX                                                                 | positive | 76 | F |
| Migita       | 2013 | Yes | Bucilamine<br>Prednisolone<br>MTX                                   | positive | 53 | F |
| Miyashita    | 2015 | Yes | MTX                                                                 | positive | 73 | F |
| Miyaza       | 2019 | Yes | MTX                                                                 | positive | 68 | F |
| Mizuguchi    | 2019 | Yes | MTX                                                                 | negative | 70 | M |
| Mizusawa     | 2019 | Yes | MTX                                                                 | negative | 70 | F |
| Mo           | 2011 | Yes | Prednisolone<br>Penicillamine<br>Sulfasalazine<br>MTX<br>infliximab | negative | 62 | M |
| Moseley      | 2000 | Yes | MTX                                                                 | NR       | 61 | F |
| Murayama     | 2018 | Yes | MTX<br>Prednisolone                                                 | positive | 76 | F |
| Nader        | 2014 | Yes | MTX<br>Plaquenil                                                    | positive | 69 | M |
| Nagai        | 2008 | Yes | MTX                                                                 | positive | 77 | F |
| Nagata       | 2015 | Yes | MTX                                                                 | positive | 39 | F |



|                |      |     |                                                        |          |    |   |
|----------------|------|-----|--------------------------------------------------------|----------|----|---|
| Naidu          | 2014 | Yes | MTX<br>Prednisolone                                    | positive | 81 | F |
| Nakanishi      | 2011 | Yes | MTX                                                    | positive | 72 | F |
| Namiki         | 2018 | Yes | MTX<br>Prednisolone                                    | positive | 64 | F |
| Nemoto         | 2010 | Yes | MTX                                                    | positive | 60 | M |
| Niewold        | 2003 | Yes | MTX                                                    | NR       | 78 | F |
| Niimi          | 2019 | Yes | MTX                                                    | negative | 63 | F |
| Nishida        | 2019 | Yes | MTX                                                    | positive | 73 | F |
| Nomura         | 2021 | Yes | MTX                                                    | positive | 81 | F |
| Obata          | 2020 | Yes | MTX                                                    | positive | 58 | F |
| Ochi           | 2013 | Yes | MTX                                                    | positive | 76 | F |
| Oda            | 2015 | Yes | Adalimumab<br>MTX                                      | positive | 24 | F |
| Oebisu         | 2018 | Yes | MTX<br>Etanercept                                      | positive | 46 | F |
| Ogasawa        | 2007 | Yes | MTX<br>Prednisolone                                    | positive | 71 | M |
| Ohkura         | 2015 | Yes | MTX                                                    | positive | 70 | M |
| Oiwa           | 2014 | Yes | MTX<br>Prednisolone<br>Folic acid<br>Diclofenac sodium | positive | 65 | F |
| Oka            | 2018 | Yes | MTX                                                    | positive | 85 | F |
| Omori          | 2021 | Yes | MTX<br>Prednisolone                                    | positive | 71 | M |
| Park           | 2008 | Yes | Etanercept<br>Tofacitinib<br>Golumumab                 | positive | 64 | F |
| Parker         | 2008 | Yes | MTX<br>Infliximab                                      | positive | 60 | F |
| Pastor-Nieto   | 2009 | Yes | MTX                                                    | positive | 79 | F |
| Pfistershammer | 2010 | Yes | MTX                                                    | negative | 67 | F |

|             |      |               |                                      |          |                   |   |
|-------------|------|---------------|--------------------------------------|----------|-------------------|---|
| Prades      | 2003 | Yes           | MTX                                  | NR       | 52                | M |
| Raja        | 2010 | Yes           | Prednisone                           | NR       | 40                | M |
| Ramos-Baena | 2021 | Yes           | MTX                                  | positive | 53                | F |
| Ravi        | 2018 | Yes           | MTX                                  | negative | 59                | F |
| Saburi      | 2018 | Yes           | Steroids<br>MTX<br>Infliximab        | positive | 59                | M |
| Sadasivam   | 2014 | Yes           | MTX                                  | positive | 65                | M |
| Sakaguchi   | 2019 | Yes           | MTX<br>Tocilizumab                   | positive | 44                | F |
| Sakurai     | 2013 | Not available |                                      |          |                   |   |
| Saleh       | 2016 | Yes           | MTX                                  | positive | 66                | F |
| Satoh       | 2009 | Yes           | MTX                                  | positive | 73                | F |
| Sekiguchi   | 2015 | Yes           | Salazosulfapyridine<br>MTX           | positive | 61                | F |
| Shimada     | 2015 | Yes           | MTX<br>Adalimumab                    | positive | between 60 and 70 | F |
| Shimizu     | 2017 | Yes           | MTX<br>Prednisolone                  | negative | 74                | M |
| Shimura     | 2009 | Yes           | Corticosteroids<br>MTX               | positive | 80                | F |
| Shinoda     | 2014 | Yes           | MTX                                  | positive | 71                | M |
| Shoda       | 2006 | Yes           | MTX                                  | positive | 71                | F |
| Soubrier    | 2006 | Yes           | MTX                                  | positive | 48                | F |
| Stewart     | 2001 | Yes           | MTX                                  | positive | 55                | M |
| Suemori     | 2015 | Yes           | MTX<br>Prednisolone<br>Sulfasalazine | positive | 79                | F |
| Sugiyama    | 2021 | Yes           | MTX<br>Prednisolone                  | positive | 66                | F |
| Suzuki      | 2018 | Yes           | MTX                                  | positive | 61                | F |
| Svensson    | 2006 | Yes           | MTX                                  | negative | 48                | F |

|             |      |               |                                                                     |          |    |    |
|-------------|------|---------------|---------------------------------------------------------------------|----------|----|----|
| Tajima      | 2015 | Yes           | MTX                                                                 | positive | 64 | F  |
| Takahashi   | 2014 | Yes           | MTX                                                                 | positive | 70 | F  |
| Takajo      | 2018 | Yes           | MTX                                                                 | negative | 74 | F  |
| Takei       | 2017 | Yes           | MTX                                                                 | positive | 65 | F  |
| Takemori    | 2012 | Yes           | MTX<br>Salazosulfapyridine<br>Bucillamine<br>Prednisolone<br>NSAIDs | positive | 60 | F  |
| Tamura      | 2016 | Not available |                                                                     |          |    |    |
| Tanaka      | 2020 | Yes           | MTX                                                                 | positive | 68 | F  |
| Tatsumi     | 2014 | Yes           | MTX                                                                 | positive | 67 | F  |
| Terroso     | 2014 | Yes           | MTX                                                                 | negative | 85 | NR |
| Thomason    | 1996 | Yes           | MTX<br>Prednisone                                                   | positive | 60 | F  |
| Tokuhira    | 2017 | Yes           | NSAIDs<br>DMARDs                                                    | positive | 60 | F  |
| Tokuyama    | 2014 | Yes           | MTX                                                                 | positive | 68 | F  |
| Toyama      | 2019 | Yes           | MTX<br>Tacrolimus                                                   | positive | 71 | F  |
| Toyonaga    | 2019 | Yes           | MTX                                                                 | negative | 70 | F  |
| Tsukazaki   | 2017 | Yes           | Infliximab<br>MTX                                                   | positive | 88 | F  |
| Tsunemine   | 2019 | Yes           | MTX                                                                 | negative | 69 | F  |
| Tsuruoka    | 2020 | Yes           | MTX                                                                 | positive | 70 | F  |
| Ujino       | 2019 | Yes           | MTX                                                                 | positive | 70 | F  |
| Uneda       | 2020 | Yes           | MTX                                                                 | positive | 68 | F  |
| Uneda       | 2008 | Yes           | MTX                                                                 | positive | 70 | F  |
| Van Haarlem | 2000 | Yes           | MTX                                                                 | positive | 59 | M  |

|               |      |     |                                            |          |    |    |
|---------------|------|-----|--------------------------------------------|----------|----|----|
| Vassilopoulos | 1998 |     | Not available                              |          |    |    |
| Vincent       | 2002 | Yes | MTX                                        | positive | NR | NR |
| Wang          | 2012 | Yes | MTX                                        | negative | 65 | F  |
| Weir 3rd      | 1989 | Yes | NR                                         | positive | NR | NR |
| Wernecke      | 2021 | Yes | MTX                                        | positive | 80 | F  |
| Yamakawa      | 2016 | Yes | MTX                                        | positive | 78 | M  |
| Yamakawa      | 2014 | Yes | MTX                                        | NR       | 70 | F  |
| Yokose        | 1998 | Yes | NR                                         | negative | 55 | F  |
| Yordanova     | 2019 | Yes | MTX                                        | positive | 69 | M  |
| Yu            | 2015 | Yes | Prednisone<br>Azathioprine                 | positive | 86 | F  |
| Zijlmans      | 1992 | Yes | Antimalarial drugs<br>Gold<br>Cyclosporine | positive | 58 | M  |

## References

1. Kamel, O.W.; Van De Rijn, M.; Lebrun, D.P.; Weiss, L.M.; Warnke, R.A.; Dorfman, R.F. Lymphoid Neoplasms in Patients With Rheumatoid Arthritis and Dermatomyositis: Frequency of Epstein-Barr Virus and Other Features Associated With Immunosuppression. *Hum Pathol.* **1994**, *25*, 638–643.
2. Bachman, T.R.; Sawitzke, A.D.; Perkins, S.L.; Ward, J.H.; Cannon, G.W. Methotrexate-associated lymphoma in patients with rheumatoid arthritis: report of two cases. *ARTHRITIS Rheum.* **1996**, *39*, 325–329.
3. A N De Rijn, M. V; Cleary, M.L.; Variakojis, D.; Warnke, R.A.; Chang, P.P.; Kamel, O.W.; van de Rijn, M.; Wamke, R.A. Epstein-Barr virus clonality in lymphomas occurring in patients with rheumatoid arthritis. *ARTHRITIS Rheum.* **1996**, *39*, 638–642.
4. Georgescu, L.; Quinn, G.C.; Schwartzman, S.; Paget, S.A. Lymphoma in Patients With Rheumatoid Arthritis: Association With the Disease State or Methotrexate Treatment. *Semin Arthritis Rheum.* **1997**, *6*, 794–804.
5. Natkunam, Y.; Elenitoba-Johnson, K.S.; Kingma, D.W.; Kamel, O.W. Epstein-Barr virus strain type and latent membrane protein 1 gene deletions in lymphomas in patients with rheumatic diseases. *ARTHRITIS Rheum.* **1997**, *40*, 1152–1156.
6. Kleiman KS, M.M. Methotrexate and lymphoma a presentation of four cases and review of the literature. *J Clin Rheumatol.* **1998**, *4*, 254–259.
7. Kojima, M.; Nakamura, S.; Shimizu, K.; Itoh, H.; Yoshida, K.; Hosomura, Y.; Yamane, N.; Ban, S.; Joshita, T.; Suchi, T. Florid reactive follicular hyperplasia in elderly patients. A clinicopathological study of 23 cases. *Pathol. Res. Pract.* **1998**, *194*, 391–397.
8. Chevrel, G.; Berger, O.; Miossec, P.; Blanc, M.; Jeanneret, J.; Felman, C.; Tebib, J. Hodgkin's disease and B cell lymphoproliferation in rheumatoid arthritis patients treated with methotrexate: a kinetic study of lymph node changes. *ARTHRITIS Rheum.* **1999**, *42*, 1773–1776.
9. Goodlad, J.R.; Hollowood, K.; Smith, M.A.; C Chan, J.K.; M Fletcher, C.D.; R, G.J.; A, S.M.; K C, C.J.; D M, F.C. Primary juxtaarticular soft tissue lymphoma arising in the vicinity of inflamed joints in patients with rheumatoid arthritis. *Histopathology.* **1999**, *34*, 199–204.
10. Menke, D.M.; Griesser, H.; Moder, K.G.; Tefferi, A.; Luthra, H.S.; Cohen, M.D.; Colon-Otero, G.; Lloyd, R. V Lymphomas in Patients With Connective Tissue Disease Comparison of p53 Protein Expression and Latent EBV Infection in Patients Immunosuppressed and Not Immunosuppressed With Methotrexate. *Am J Clin Pathol* **2000**, *113*, 212–218.
11. Dawson TM, Starkebaum G, Wood BL, Willkens RF, G.A. Epstein-Barr virus, methotrexate, and lymphoma in patients with rheumatoid arthritis and primary Sjögren's syndrome: case series. *J Rheumatol* **2001**, *28*, 47–53.
12. Tournadre, A.; D'incan, M.; Dubost, J.J.; Franck, F.; Déchelotte, P.; Souteyrand, P.; Soubrier, M. Cutaneous lymphoma associated with Epstein-Barr virus infection in 2 patients treated with methotrexate. *Mayo Clin. Proc.* **2001**, *76*, 845–848.

13. Mariette, X.; Cazals-Hatem, D.; Warszawski, J.; Liote, R.; Balandraud, N.; Sibilia, J. Lymphomas in rheumatoid arthritis patients treated with methotrexate: a 3-year prospective study in France. *Blood*. **2002**, *99*, 3909–3915.
14. Baecklund, E.; Sundström, C.; Ekbom, A.; Catrina, A.I.; Biberfeld, P.; Feltelius, N.; Klareskog, L. Lymphoma subtypes in patients with rheumatoid arthritis: Increased proportion of diffuse large B cell lymphoma. *Arthritis Rheum*. **2003**, *48*, 1543–1550.
15. Magro, C.M.; Porcu, P.; Ahmad, N.; Klinger, D.; Crowson, A.N.; Nuovo, G. Cutaneous Immunocytoma A Clinical, Histologic, and Phenotypic Study of 11 Cases. *Appl Immunohistochem Mol Morphol*. **2004**, *12*, 216–224.
16. Verma S, Frambach GE, Seilstad KH, Nuovo G, Porcu P, M.C. Epstein-Barr virus-associated B-cell lymphoma in the setting of iatrogenic immune dysregulation presenting initially in the skin. *J Cutan Pathol* **2005**, *32*, 474–83.
17. Au, W.Y.; Ma, E.S.K.; Choy, C.; Chung, L.P.; Fung, T.K.; Liang, R.; Kwong, Y.L. Therapy-related lymphomas in patients with autoimmune diseases after treatment with disease-modifying anti-rheumatic drugs. *Am. J. Hematol*. **2006**, *81*, 5–11.
18. Baecklund, E.; Iliadou, A.; Askling, J.; Ekbom, A.; Backlin, C.; Granath, F.; Catrina, A.I.; Rosenquist, R.; Feltelius, N.; Sundström, C.; et al. Association of chronic inflammation, not its treatment, with increased lymphoma risk in rheumatoid arthritis. *Arthritis Rheum*. **2006**, *54*, 692–701.
19. Xu, J.X.; Hoshida, Y.; Hongyo, T.; Sasaki, T.; Miyazato, H.; Tomita, Y.; Aozasa, K. Analysis of p53 and Bak gene mutations in lymphoproliferative disorders developing in rheumatoid arthritis. *J. Cancer Res. Clin. Oncol*. **2007**, *133*, 125–133.
20. Kojima, M.; Itoh, H.; Hirabayashi, K.; Igarashi, S.; Tamaki, Y.; Murayama, K.; Ogura, H.; Saitoh, R.; Kashiwabara, K.; Takimoto, J.; et al. Methotrexate-associated lymphoproliferative disorders. A clinicopathological study of 13 Japanese cases. *Pathol. Res. Pract*. **2006**, *202*, 679–685.
21. Kojima, M.; Itoh, H.; Shimizu, K.; Saruki, N.; Murayama, K.; Higuchi, K.; Tamaki, Y.; Matsumoto, M.; Hirabayashi, K.; Igarashi, S.; et al. Malignant Lymphoma in Patients with Systemic Rheumatic Disease (Rheumatoid Arthritis, Systemic Lupus Erythematosus, Systemic Sclerosis, and Dermatomyositis): A Clinicopathologic Study of 24 Japanese Cases. *Int. J. Surg. Pathol*. **2006**, *14*, 43–48.
22. Miyazaki, T.; Fujimaki, K.; Shirasugi, Y.; Yoshida, F.; Ohsaka, M.; Miyazaki, K.; Yamazaki, E.; Sakai, R.; Tamaru, J.I.; Kishi, K.; et al. Remission of lymphoma after withdrawal of methotrexate in rheumatoid arthritis: Relationship with type of latent Epstein-Barr virus infection. *Am. J. Hematol*. **2007**, *82*, 1106–1109.
23. Kleinschmidt-Demasters, B.K.; Damek, D.M.; Lillehei, K.O.; Dogan, A.; Giannini, C. Epstein Barr Virus-Associated Primary CNS Lymphomas in Elderly Patients on Immunosuppressive Medications. *J Neuropathol Exp Neurol*. **2008**, *67*, 1103–1111.
24. Hasserjian, R.P.; Chen, S.; Perkins, S.L.; De Leval, L.; Kinney, M.C.; Barry, T.S.; Said, J.; Lim, M.S.; Finn, W.G.; Medeiros, L.J.; et al. Immunomodulator agent-related lymphoproliferative disorders. *Mod. Pathol*. **2009**, *22*, 1532–1540.

25. Hellgren, K.; Iliadou, A.; Rosenquist, R.; Feltelius, N.; Backlin, C.; Enblad, G.; Askling, J.; Baecklund, E. Rheumatoid arthritis, treatment with corticosteroids and risk of malignant lymphomas: Results from a case-control study. *Ann. Rheum. Dis.* **2010**, *69*, 654–659.
26. Mariette, X.; Tubach, F.; Bagheri, H.; Bardet, M.; Berthelot, J.M.; Gaudin, P.; Heresbach, D.; Martin, A.; Schaevebeke, T.; Salmon, D.; et al. Lymphoma in patients treated with anti-TNF: Results of the 3-year prospective French RATIO registry. *Ann. Rheum. Dis.* **2010**, *69*, 400–408.
27. Kojima, M.; Nakamura, N.; Tsukamoto, N.; Itoh, H.; Matsuda, H.; Kobayashi, S.; Ueki, K.; Irisawa, H.; Murayama, K.; Igarashi, T.; et al. Atypical Lymphoplasmacytic and Immunoblastic Proliferation of Autoimmune Disease : Clinicopathologic and Immunohistochemical Study of 9 Cases. *J Clin Exp Hematop.* **2010**, *50*, 113–119.
28. Nakamichi, N.; Wada, N.; Kohara, M.; Fukuhara, S.; Sugiyama, H.; Ogawa, H.; Hino, M.; Kanamaru, A.; Kanakura, Y.; Morii, E.; et al. Polymorphous lymphoproliferative disorder: A clinicopathological analysis. *Virchows Arch.* **2010**, *456*, 269–276.
29. Niitsu, N.; Okamoto, M.; Nakamine, H.; Hirano, M. Clinicopathologic correlations of diffuse large B-cell lymphoma in rheumatoid arthritis patients treated with methotrexate. *Cancer Sci.* **2010**, *101*, 1309–1313.
30. Löfström, B.; Backlin, C.; Pettersson, T.; Lundberg, I.E.; Baecklund, E. Expression of APRIL in diffuse large B cell lymphomas from patients with systemic lupus erythematosus and rheumatoid arthritis. *J. Rheumatol.* **2011**, *38*, 1891–1897.
31. Minamimoto, R.; Ito, K.; Kubota, K.; Morooka, M.; Masuda-Miyata, Y.; Hirai, R.; Kitahara, H.; Tanimura, A.; Hagiwara, S.; Dip, G.; et al. Clinical Role of FDG PET/CT for Methotrexate-Related Malignant Lymphoma. *Clin Nucl Med.* **2011**, *36*, 533–537.
32. Tokuhira, M.; Watanabe, R.; Nemoto, T.; Sagawa, M.; Tomikawa, T.; Tamaru, J.I.; Itoyama, S.; Nagasawa, H.; Amano, K.; Kameda, H.; et al. Clinicopathological analyses in patients with other iatrogenic immunodeficiency-associated lymphoproliferative diseases and rheumatoid arthritis. *Leuk. Lymphoma* **2012**, *53*, 616–623.
33. Ichikawa, A.; Arakawa, F.; Kiyasu, J.; Sato, K.; Miyoshi, H.; Niino, D.; Kimura, Y.; Takeuchi, M.; Yoshida, M.; Ishibashi, Y.; et al. Methotrexate/iatrogenic lymphoproliferative disorders in rheumatoid arthritis: Histology, Epstein-Barr virus, and clonality are important predictors of disease progression and regression. *Eur. J. Haematol.* **2013**, *91*, 20–28.
34. Kondo, S.; Tanimoto, K.; Yamada, K.; Yoshimoto, G.; Suematsu, E.; Fujisaki, T.; Oshiro, Y.; Tamura, K.; Takeshita, M.; Okamura, S. Mature T/NK-cell lymphoproliferative disease and Epstein-Barr virus infection are more frequent in patients with rheumatoid arthritis treated with methotrexate. *Virchows Arch.* **2013**, *462*, 399–407.
35. Loo, E.Y.; Medeiros, L.J.; Aladily, T.N.; Hoehn, D.; Kanagal-Shamanna, R.; Young, K.H.; Lin, P.; Bueso-Ramos, C.E.; Manning, J.T.; Patel, K.; et al. Classical Hodgkin Lymphoma Arising in the Setting of Iatrogenic Immunodeficiency A Clinicopathologic Study of 10 Cases. *Am J Surg Pathol.* **2013**, *37*, 1290–1297.
36. Yamakawa, N.; Fujimoto, M.; Kawabata, D.; Terao, C.; Nishikori, M.; Nakashima, R.; Imura, Y.; Yukawa, N.; Yoshifuji, H.; Ohmura, K.; et al. A clinical, pathological, and genetic characterization

of methotrexate-associated lymphoproliferative disorders. *J. Rheumatol.* **2014**, *41*, 293–299.

37. Kameda, T.; Dobashi, H.; Miyatake, N.; Inoo, M.; Onishi, I.; Kurata, N.; Mitsunaka, H.; Kawakami, K.; Fukumoto, T.; Susaki, K.; et al. Association of higher methotrexate dose with lymphoproliferative disease onset in rheumatoid arthritis patients. *Arthritis Care Res.* **2014**, *66*, 1302–1309.
38. Koens, L.; Senff, N.J.; Vermeer, M.H.; Willemze, R.; Jansen, P.M. Methotrexate-associated B-cell Lymphoproliferative Disorders Presenting in the Skin A Clinicopathologic and Immunophenotypical Study of 10 Cases. *Am J Surg Pathol.* **2014**, *38*, 999–1006.
39. Berghen, N.; Teuwen, L.A.; Westhovens, R.; Verschueren, P. Malignancies and anti-TNF therapy in rheumatoid arthritis: a single-center observational cohort study. *Clin. Rheumatol.* **2015**, *34*, 1687–1695.
40. Hashimoto, K.; Nagao, T.; Saito, T.; Kinoshita, H. Methotrexate-associated lymphoproliferative disorders of the tongue developing in patients with rheumatoid arthritis: A report of 2 cases and a review. *Oral Surg. Oral Med. Oral Pathol. Oral Radiol.* **2015**, *119*, e1–e5.
41. Hollander, P.; Rostgaard, K.; Smedby, K.E.; Chang, E.T.; Amini, R.M.; De Nully Brown, P.; Glimelius, B.; Adami, H.O.; Melbye, M.; Glimelius, I.; et al. Autoimmune and atopic disorders and risk of classical hodgkin lymphoma. *Am. J. Epidemiol.* **2015**, *182*, 624–632, doi:10.1093/aje/kwv081.
42. Inui, Y.; Matsuoaka, H.; Yakushijin, K.; Okamura, A.; Shimada, T.; Yano, S.; Takeuchi, M.; Ito, M.; Murayama, T.; Yamamoto, K.; et al. Methotrexate-associated lymphoproliferative disorders: Management by watchful waiting and observation of early lymphocyte recovery after methotrexate withdrawal. *Leuk. Lymphoma* **2015**, *56*, 3045–3051.
43. Shimizu, S.; Inokuma, D.; Murata, J.; Kikuchi, K.; Ito, T.; Fukasawa, Y.; Mukai, M.; Moriuchi, R. Cutaneous manifestations of methotrexate-associated lymphoproliferative disorders: Report of two cases and a review of the literature. *Acta Derm. Venereol.* **2015**, *95*, 366–367.
44. Yamada, K.; Oshiro, Y.; Okamura, S.; Fujisaki, T.; Kondo, S.; Nakayama, Y.; Suematsu, E.; Tamura, K.; Takeshita, M. Clinicopathological characteristics and rituximab addition to cytotoxic therapies in patients with rheumatoid arthritis and methotrexate-associated large B lymphoproliferative disorders. *Histopathology* **2015**, *67*, 70–80.
45. Jeon, Y.W.; Yoon, J.H.; Lee, S.E.; Eom, K.S.; Kim, Y.J.; Kim, H.J.; Lee, S.; Min, C.K.; Lee, J.W.; Min, W.S.; et al. Clinical manifestations of autoimmune disease-related non-Hodgkin lymphoma: A Korean single-center, retrospective clinical study. *Korean J. Intern. Med.* **2016**, *31*, 944–952.
46. Watanabe, S.; Manabe, O.; Hirata, K.; Oyama-Manabe, N.; Hattori, N.; Kikuchi, Y.; Kobayashi, K.; Toyonaga, T.; Tamaki, N. The usefulness of 18F-FDG PET/CT for assessing methotrexate-associated lymphoproliferative disorder (MTX-LPD). *BMC Cancer* **2016**, *16*, 635.
47. Carroll, M.; Biswas, N.; Wheller, L.; Shepherd, V.; Strutton, G.M. Uncommon cutaneous lymphoproliferative disorders in two patients with rheumatoid arthritis. *Australas. J. Dermatol.* **2017**, *58*, e101–e104.
48. Ejima-Yamada, K.; Oshiro, Y.; Okamura, S.; Fujisaki, T.; Mihashi, Y.; Tamura, K.; Fukushima, T.; Kojima, M.; Shibuya, K.; Takeshita, M. Epstein–Barr virus infection and gene promoter



hypermethylation in rheumatoid arthritis patients with methotrexate-associated B cell lymphoproliferative disorders. *Virchows Arch.* **2017**, *470*, 205–215.

49. Katsuyama, T.; Sada, K.E.; Yan, M.; Zeggar, S.; Hiramatsu, S.; Miyawaki, Y.; Ohashi, K.; Morishita, M.; Watanabe, H.; Katsuyama, E.; et al. Prognostic factors of methotrexate-associated lymphoproliferative disorders associated with rheumatoid arthritis and plausible application of biological agents. *Mod. Rheumatol.* **2017**, *27*, 773–777.
50. Gion, Y.; Iwaki, N.; Takata, K.; Takeuchi, M.; Nishida, K.; Orita, Y.; Tachibana, T.; Yoshino, T.; Sato, Y. Clinicopathological analysis of methotrexate-associated lymphoproliferative disorders: Comparison of diffuse large B-cell lymphoma and classical Hodgkin lymphoma types. *Cancer Sci.* **2017**, *108*, 1271–1280.
51. Takanashi, S.; Aisa, Y.; Ito, C.; Arakaki, H.; Osada, Y.; Amano, Y.; Hirano, M.; Nakazato, T. Clinical characteristics of methotrexate-associated lymphoproliferative disorders: relationship between absolute lymphocyte count recovery and spontaneous regression. *Rheumatol. Int.* **2017**, *37*, 1629–1633.
52. Mariette, X.; Chen, C.; Biswas, P.; Kwok, K.; Boy, M.G. Lymphoma in the Tofacitinib Rheumatoid Arthritis Clinical Development Program. *Arthritis Care Res.* **2018**, *70*, 685–694.
53. Tsukui, D.; Kanda, H.; Shinozaki-Ushiku, A.; Tateishi, S.; Takeshima, Y.; Nagafuchi, Y.; Sasaki, O.; Iwasaki, Y.; Harada, H.; Shibuya, M.; et al. Polymorphic lymphoproliferative disorders in patients with rheumatoid arthritis are associated with a better clinical outcome. *Mod. Rheumatol.* **2018**, *28*, 621–625.
54. Tokuhira, M.; Saito, S.; Okuyama, A.; Suzuki, K.; Higashi, M.; Momose, S.; Shimizu, T.; Mori, T.; Anan-Nemoto, T.; Amano, K.; et al. Clinicopathologic investigation of methotrexate-induced lymphoproliferative disorders, with a focus on regression. *Leuk. Lymphoma* **2018**, *59*, 1143–1152.
55. Carreras, J.; Kikuti, Y.Y.; Miyaoka, M.; Hiraiwa, S.; Tomita, S.; Ikoma, H.; Kondo, Y.; Shiraiwa, S.; Ando, K.; Sato, S.; et al. Genomic Profile and Pathologic Features of Diffuse Large B-Cell Lymphoma Subtype of Methotrexate-associated Lymphoproliferative Disorder in Rheumatoid Arthritis Patients. *Am J Surg Pathol.* **2018**, *42*, 936–950.
56. Daroontum, T.; Kohno, K.; Eladl, A.E.; Satou, A.; Sakakibara, A.; Matsukage, S.; Yakushiji, N.; Ya-In, C.; Nakamura, S.; Asano, N.; et al. Comparison of Epstein–Barr virus-positive mucocutaneous ulcer associated with treated lymphoma or methotrexate in Japan. *Histopathology* **2018**, *72*, 1115–1127.
57. Gong, S.; Crane, G.M.; McCall, C.M.; Xiao, W.; Ganapathi, K.A.; Cuka, N.; Davies-Hill, T.; Xi, L.; Raffeld, M.; Pittaluga, S.; et al. Expanding the Spectrum of EBV-positive Marginal Zone Lymphomas A Lesion Associated With Diverse Immunodeficiency Settings. *Am J Surg Pathol.* **2018**, *42*, 1306–1316.
58. Marcelis, L.; Berghen, C.; De Zutter, A.; Biesemans, P.; Vandenberghe, P.; Verhoef, G.; Gheysens, O.; Sagaert, X.; Dierickx, D.; Tousseyn, T. Other immunomodulatory agent-related lymphoproliferative diseases: a single-center series of 72 biopsy-confirmed cases. *Mod. Pathol.* **2018**, *31*, 1457–1469.
59. Saito, S.; Suzuki, K.; Yoshimoto, K.; Kaneko, Y.; Yamaoka, K.; Shimizu, T.; Mori, T.; Okamoto, S.;

- Kameyama, K.; Amano, K.; et al. Restoration of decreased T helper 1 and CD8+ T cell subsets is associated with regression of lymphoproliferative disorders developed during methotrexate treatment. *Front. Immunol.* **2018**, *9*, 621.
60. Takanashi, S.; Nakazato, T.; Aisa, Y.; Ito, C.; Arakaki, H.; Osada, Y.; Hirano, M.; Mori, T. The prognostic value of positron emission tomography/computed tomography in rheumatoid arthritis patients with methotrexate-associated lymphoproliferative disorders. *Ann. Hematol.* **2018**, *97*, 1611–1618.
  61. Kurita, D.; Miyoshi, H.; Ichikawa, A.; Kato, K.; Imaizumi, Y.; Seki, R.; Sato, K.; Sasaki, Y.; Kawamoto, K.; Shimono, J.; et al. Methotrexate-associated Lymphoproliferative Disorders in Patients With Rheumatoid Arthritis Clinicopathologic Features and Prognostic Factors. *Am J Surg Pathol* **2019**, *43*, 869–884.
  62. Satou, A.; Banno, S.; Hanamura, I.; Takahashi, E.; Takahara, T.; Nobata, H.; Katsuno, T.; Takami, A.; Ito, Y.; Ueda, R.; et al. EBV-positive mucocutaneous ulcer arising in rheumatoid arthritis patients treated with methotrexate: Single center series of nine cases. *Pathol. Int.* **2019**, *69*, 21–28.
  63. Satou, A.; Tabata, T.; Miyoshi, H.; Kohno, K.; Suzuki, Y.; Yamashita, D.; Shimada, K.; Kawasaki, T.; Sato, Y.; Yoshino, T.; et al. Methotrexate-associated lymphoproliferative disorders of T-cell phenotype: clinicopathological analysis of 28 cases. *Mod. Pathol.* **2019**, *32*, 1135–1146.
  64. Yoshifuji, K.; Umezawa, Y.; Ichikawa, A.; Watanabe, K.; Miura, O.; Yamamoto, M. Methotrexate-associated classical hodgkin lymphoma shows distinct clinicopathological features but comparable clinical outcomes with sporadic cases. *In Vivo (Brooklyn)*. **2019**, *33*, 1599–1604.
  65. Fujimoto, K.; Hatanaka, K.C.; Hatanaka, Y.; Kasahara, I.; Yamamoto, S.; Tsuji, T.; Nakata, M.; Takakuwa, Y.; Haseyama, Y.; Oyamada, Y.; et al. Association of Epstein–Barr virus with regression after withdrawal of immunosuppressive drugs and subsequent progression of iatrogenic immunodeficiency-associated lymphoproliferative disorders in patients with autoimmune diseases. *Hematol. Oncol.* **2020**, *38*, 799–807.
  66. Ikeda, T.; Gion, Y.; Sakamoto, M.; Tachibana, T.; Nishikori, A.; Nishimura, M.F.; Yoshino, T.; Sato, Y. Clinicopathological analysis of 34 Japanese patients with EBV-positive mucocutaneous ulcer. *Mod. Pathol.* **2020**, *33*, 2437–2448.
  67. Kohno, K.; Suzuki, Y.; Elsayed, A.A.; Sakakibara, A.; Takahara, T.; Satou, A.; Kato, S.; Nakamura, S.; Asano, N. Immunohistochemical Assessment of the Diagnostic Utility of PD-L1 (Clone SP142) for Methotrexate-Associated Lymphoproliferative Disorders with an Emphasis of Neoplastic PD-L1 (Clone SP142)-Positive Classic Hodgkin Lymphoma Type. *Am. J. Clin. Pathol.* **2020**, *153*, 571–582.
  68. Laurent, C.; Arber, D.A.; Johnston, P.; Fend, F.; Zamo, A.; Attygalle, A.D. Diagnosis of classic Hodgkin lymphoma on bone marrow biopsy. *Histopathology* **2020**, *76*, 934–941.
  69. Matsubayashi, S.; Suzuki, M.; Sakamoto, K.; Izumi, S.; Hojo, M.; Sugiyama, H. Three different CT and FDG PET/CT findings of pulmonary involvement in methotrexate-associated lymphoproliferative disease. *Respirol. Case Reports* **2020**, *8*, e00520.
  70. Shiraiwa, S.; Kikuti, Y.Y.; Carreras, J.; Hara, R.; Aoyama, Y.; Ogiya, D.; Suzuki, R.; Toyosaki, M.; Ohmachi, K.; Ogawa, Y.; et al. Clinicopathological evaluation of methotrexate-associated

lymphoproliferative disorders with special focus on Epstein-Barr virus-positive mucocutaneous lesions. *J. Clin. Exp. Hematop.* **2020**, *60*, 159–168, doi:10.3960/jslrt.20041.

71. Tokuhira, M.; Tanaka, Y.; Takahashi, Y.; Kimura, Y.; Tomikawa, T.; Anan, T.; Watanabe, J.; Sagawa, M.; Higashi, M.; Momose, S.; et al. The clinical impact of absolute lymphocyte count in peripheral blood among patients with methotrexate - associated lymphoproliferative disorders. *J. Clin. Exp. Hematop.* **2020**, *60*, 41–50.
72. Yamada, C.; Oguro, E.; Tsuji, S.; Kudo-Tanaka, E.; Teshigawara, S.; Ohshima, S.; Hashimoto, J.; Saeki, Y.; Horiuchi, T.; Iizuka, N.; et al. Pathological assessment of the lymph node biopsies for lymphadenopathy in rheumatoid arthritis. *Mod. Rheumatol.* **2020**, *30*, 835–842.
73. Kondo, M.; Murakawa, Y.; Moriyama, M.; Honda, M.; Sugiura, T.; Onoda, K.; Watanabe, Y.; Kakimaru, H. Distinct decrease in peripheral lymphocytes in EBER-positive cases of MTX-LPD. *Mod. Rheumatol.* **2021**, *31*, 88–93.
74. Kuramoto, N.; Saito, S.; Fujii, T.; Kaneko, Y.; Saito, R.; Tanaka, M.; Takada, H.; Nakano, K.; Saito, K.; Sugimoto, N.; et al. Characteristics of rheumatoid arthritis with immunodeficiency-associated lymphoproliferative disorders to regress spontaneously by the withdrawal of methotrexate and their clinical course: A retrospective, multicenter, case–control study. *Mod. Rheumatol.* **2021**, 1–16.
75. Nakano, K.; Saito, K.; Nawata, A.; Hanami, K.; Kubo, S.; Miyagawa, I.; Fujino, Y.; Nakayamada, S.; Tanaka, Y. Clinical aspects in patients with rheumatoid arthritis complicated with lymphoproliferative disorders without regression after methotrexate withdrawal and treatment for arthritis after regression of lymphoproliferative disorders. *Mod. Rheumatol.* **2021**, *31*, 94–100.
76. Takada H, Kaneko Y, Nakano K, Tanaka M, Fujii T, Saito K, Sugimoto N, Sasaki S, Saito S, Saito R, Kuramoto N, Harigai M, S.Y. Clinicopathological characteristics of lymphoproliferative disorders in 232 patients with rheumatoid arthritis in Japan: A retrospective, multicenter, descriptive study. *Mod. Rheumatol.* **2021**, 1–9.
77. He, J.; Williamson, L.; Cai, K.; Wong, P.; Sturgess, A.; Taper, J.; Manolios, N. Epstein-Barr virus - related lymphoma in rheumatoid arthritis: Implications for long-term usage of immunosuppressive drugs and review of the literature. *Intern. Med. J.* **2021**.
